# Supplementary material for: NH Stretching Frequencies of Intramolecularly Hydrogen-Bonded Systems: An Experimental and Theoretical Study
Source: MDPI journal article supplement (doi:10.3390/molecules26247651), 2021-12-17
Supplement: s1 [file s1]

# **NH stretching frequencies of intramolecularly hydrogen bonded systems.**

## **An experimental and theoretical study.**

Poul Erik Hansen,<sup>a</sup> Mohammad Vakili,<sup>b</sup> Fadhil S. Kamounah,<sup>c</sup> and Jens Spanget-Larsen<sup>a</sup>

a. Department of Science and Environment, Roskilde University, Universitetsvej 1, DK-4000 Roskilde, Denmark

b. Department of Chemistry, Faculty of Science, Ferdowsi University of Mashhad, Mashhad, Iran.

c. Department of Chemistry, Universitetsparken 5, University of Copenhagen, Denmark

## **Supplementary Material**

- S1.** IR spectrum of compound **6**.
- S2.** IR spectrum of compound **11**.
- S3.** IR spectrum of compound **17** (see also **S15**).
- S4.** IR spectrum of compound **19**.
- S5.** IR spectrum of compound **45**.
- S6.** IR spectrum of compound **14**.
- S7.** IR spectrum of compound **16**.
- S8.** IR spectrum of compound **44**.
- S9.** IR spectrum of compound **8**.
- S10.** IR spectrum of compound **9**.
- S11.** IR spectrum of compound **10**.
- S12.** Experimental NH stretching wavenumbers vs. those calculated within the harmonic approximation with B3LYP/6-31G(d).
- S13.** Harmonic NH stretching wavenumbers computed with B3LYP/6-311++G(d,p) vs. those obtained with B3LYP/6-31G(d).
- S14.** B3LYP/6-31G(d) anharmonic VPT2 frequencies vs. the corresponding harmonic ones.
- S15.** Subtraction IR spectra of compound **17**.
- S16.** Harmonic NH stretching wavenumbers vs. NH bond distances (B3LYP/6-31G(d)).
- S17.** Observed NH stretching wavenumbers vs. hydrogen bond energies,  $E_{\text{HB}}$ , estimated according to Espinosa et al. - Linear fit.
- S18.** Observed NH stretching wavenumbers vs. hydrogen bond energies,  $E_{\text{HB}}$ , estimated according to Espinosa et al. - Parabolic fit.
- S19.** Optimized molecular structures of **17** computed with B3LYP/6-311++G(d,p) with relative energies in kcal/mol.
- S20.** Fundamental band assignments for **17** (17-H) and deuterated **17** (17-D).
- S21.** Materials section: Synthesis, characterization, and NMR spectra.

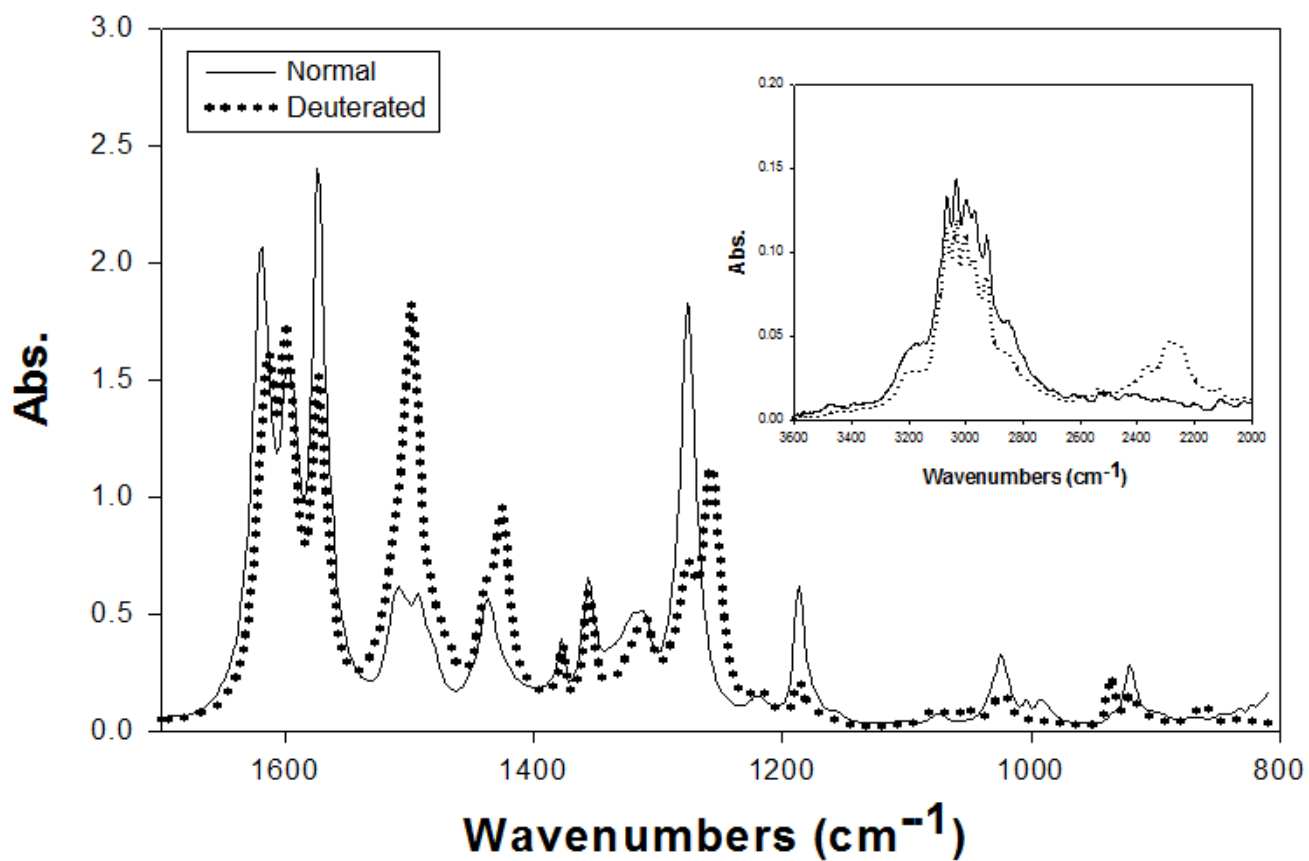

S1. IR spectrum of compound 6.

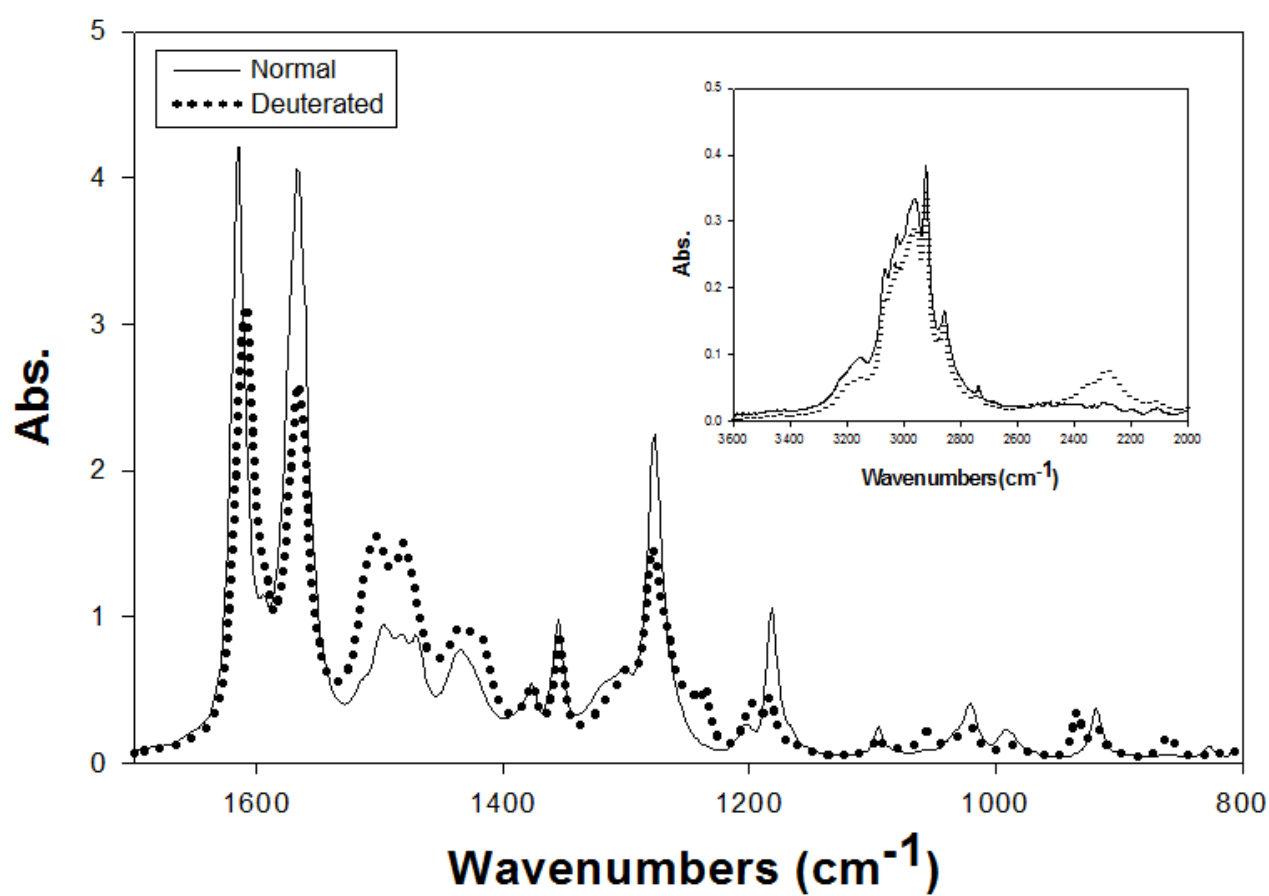

S2. IR spectrum of compound 11.

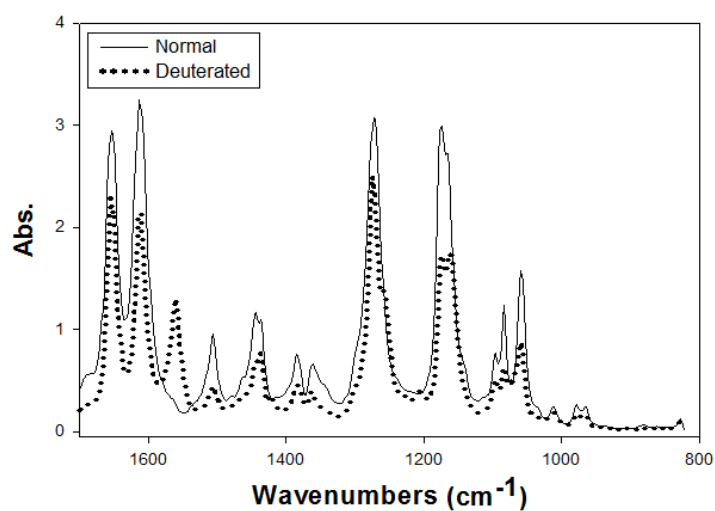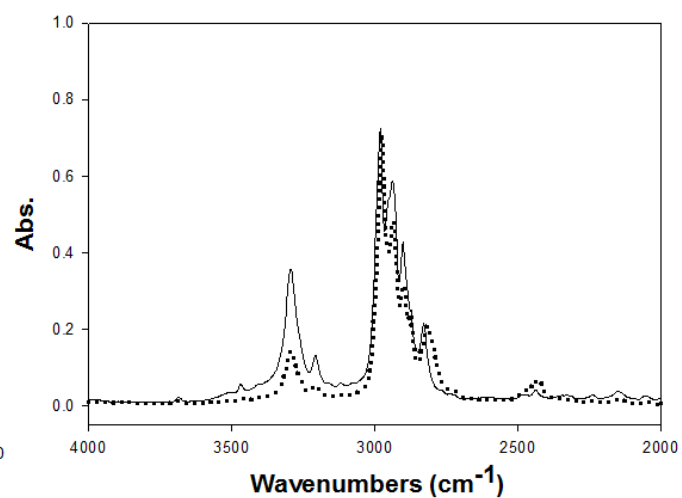

**S3.** IR spectrum of compound **17** (see also **S15**).

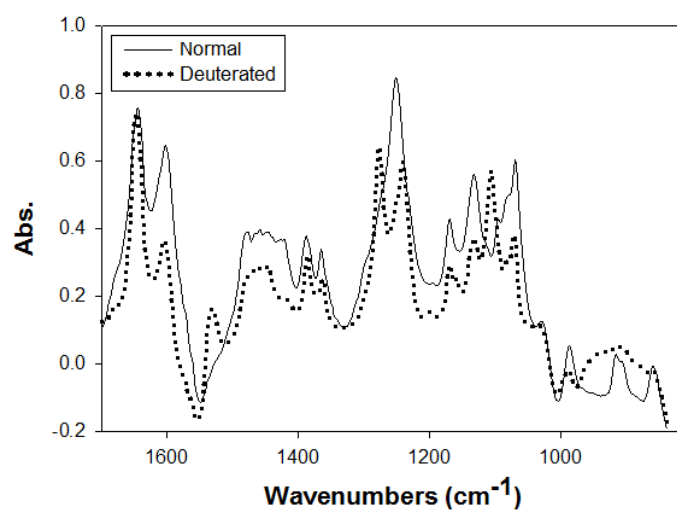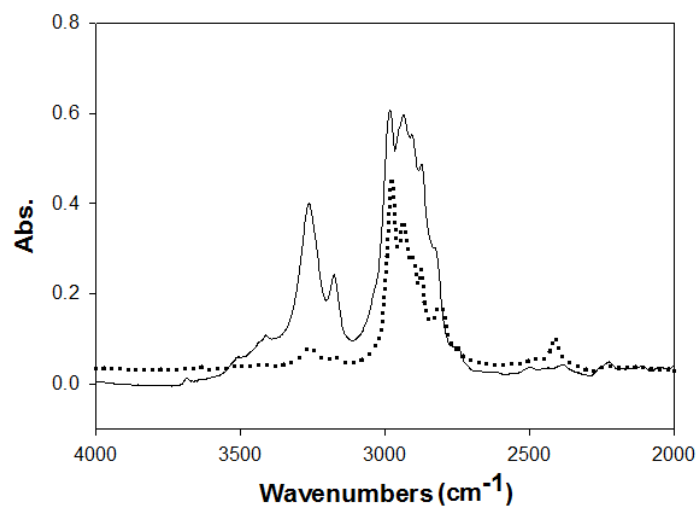

**S4.** IR spectrum of compound **19**.

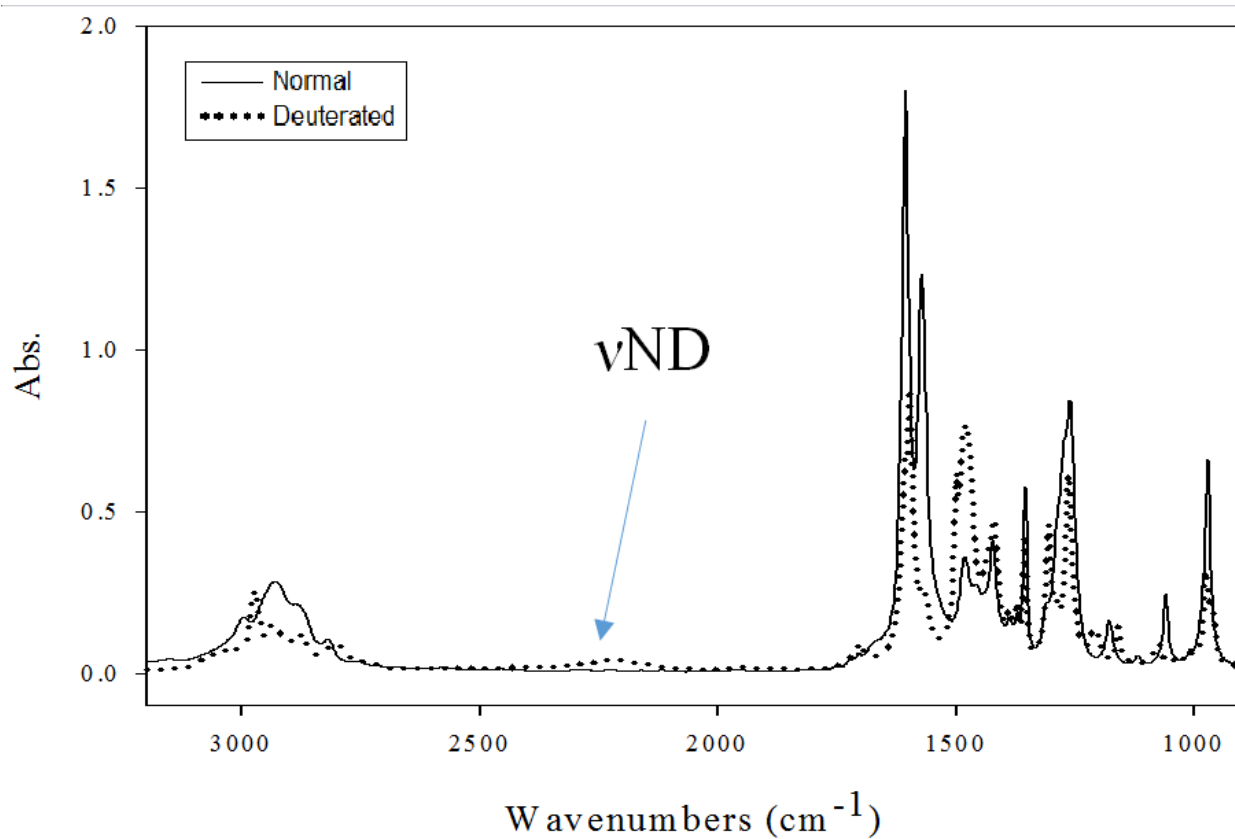

**S5.** IR spectrum of compound **45**.

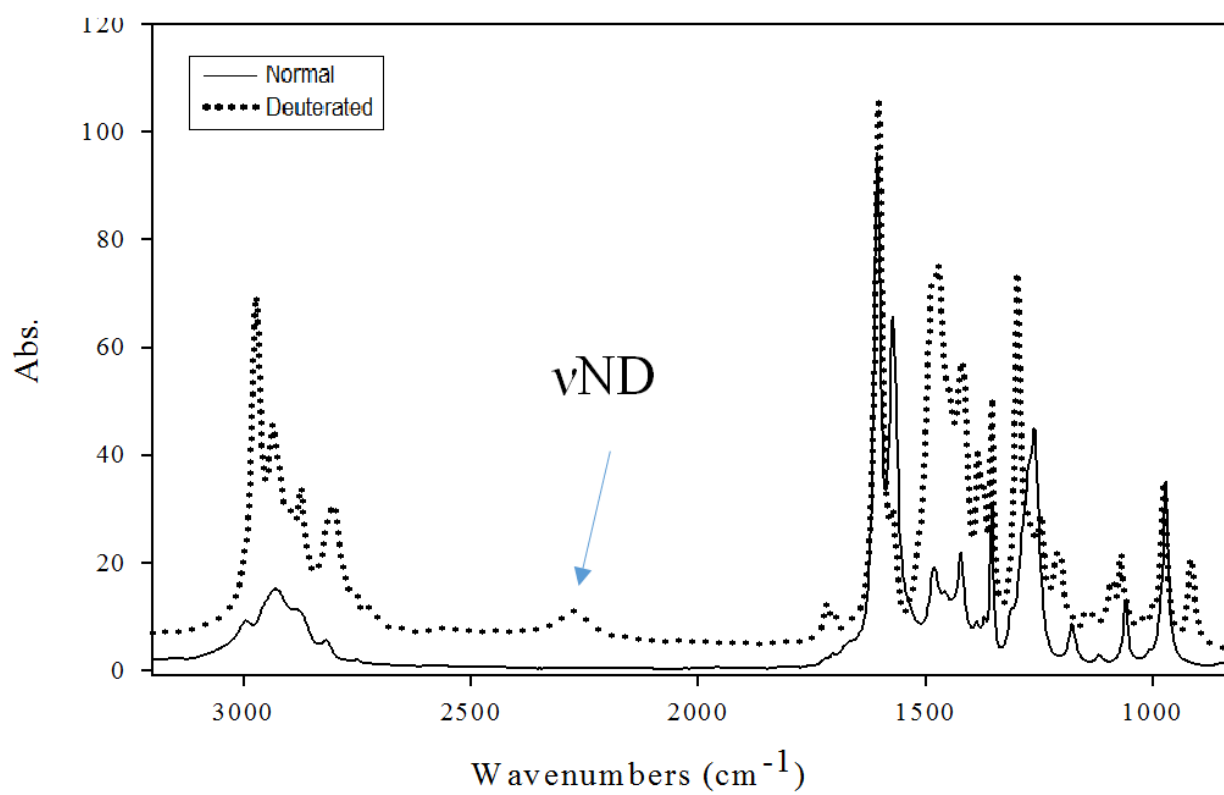

**S6.** IR spectrum of compound **14**.

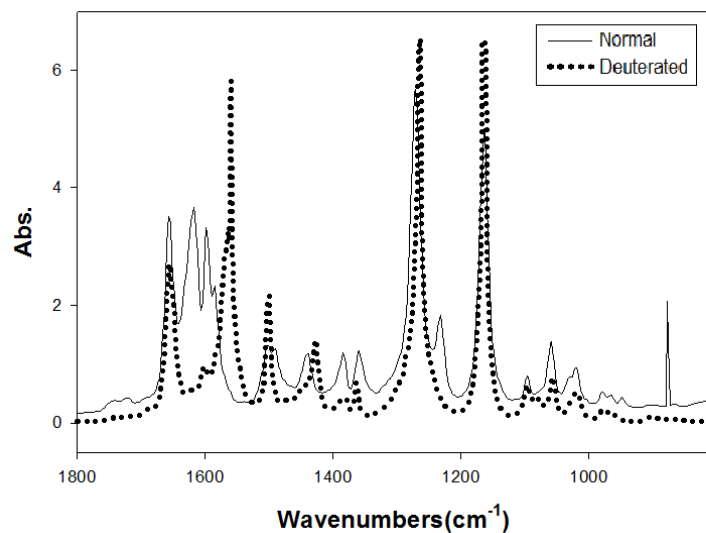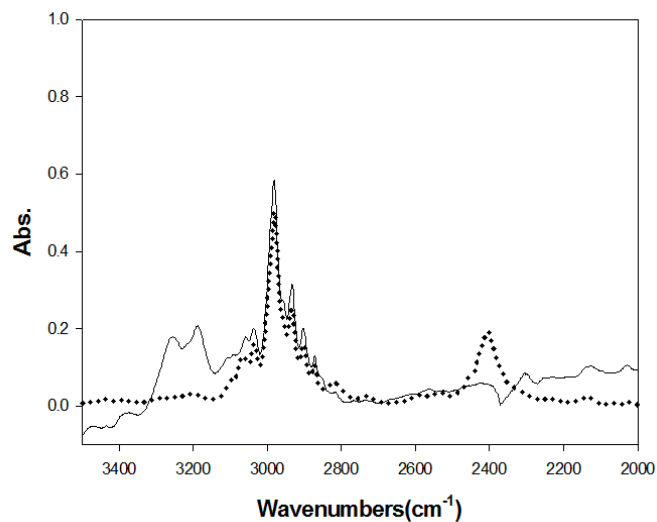

S7. IR spectrum of compound 16.

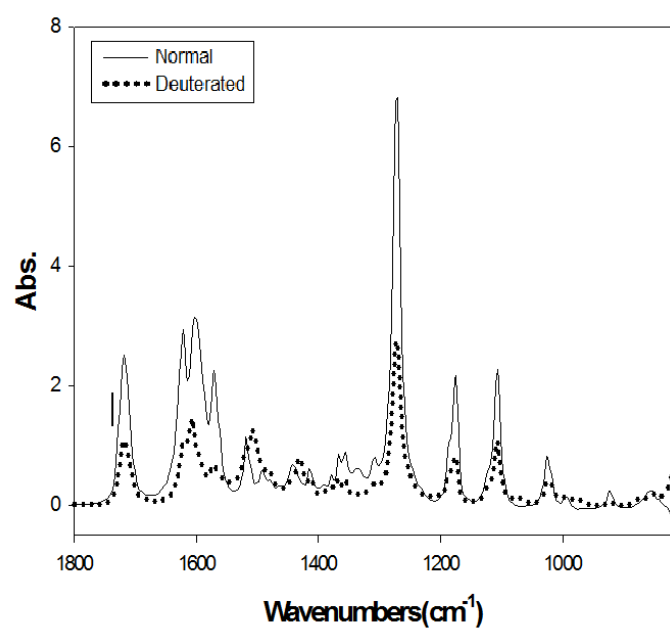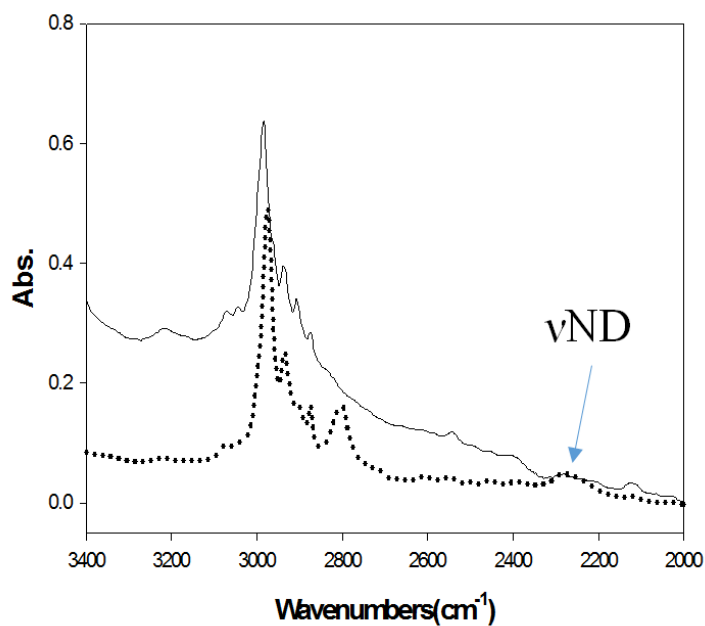

S8. IR spectrum of compound 44.

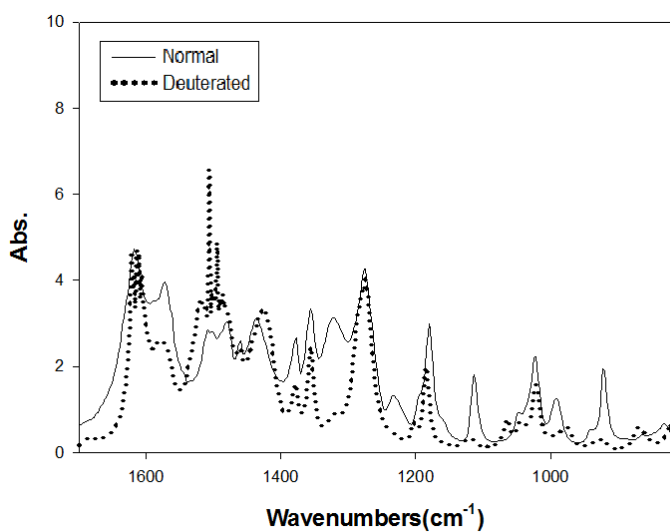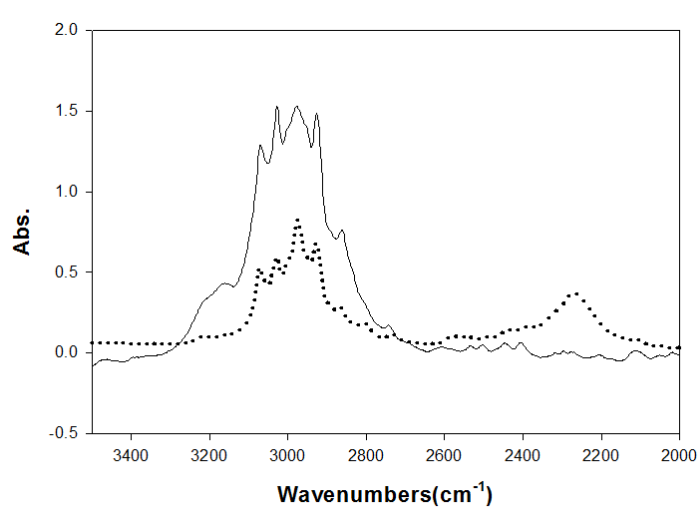

S9. IR spectrum of compound 8.

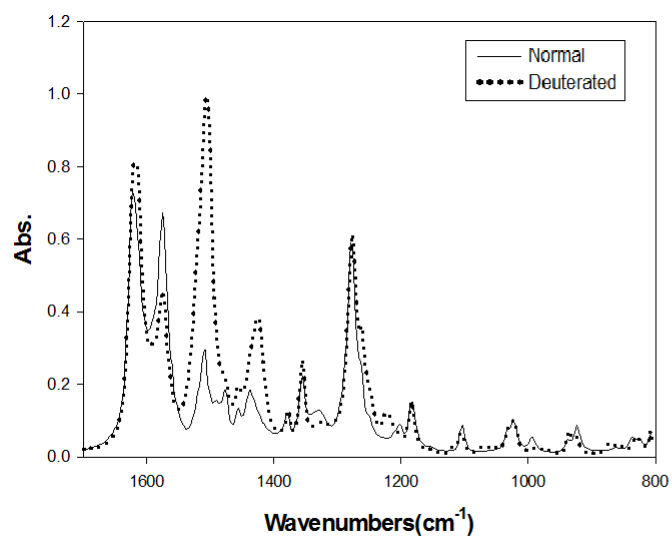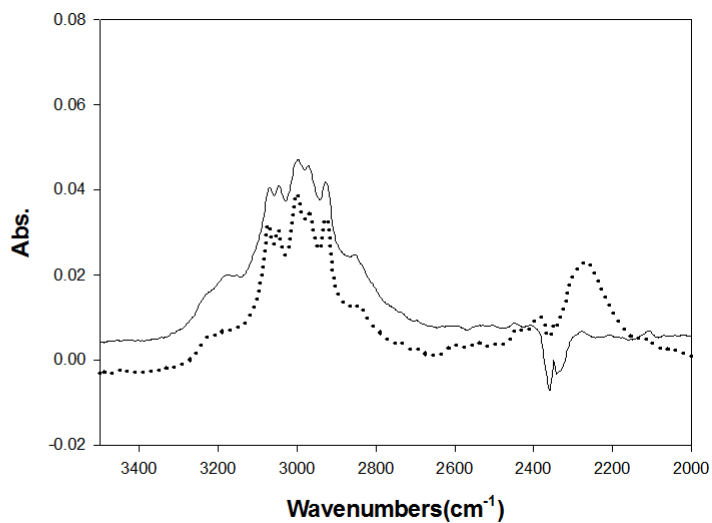

**S10.** IR spectrum of compound **9**.

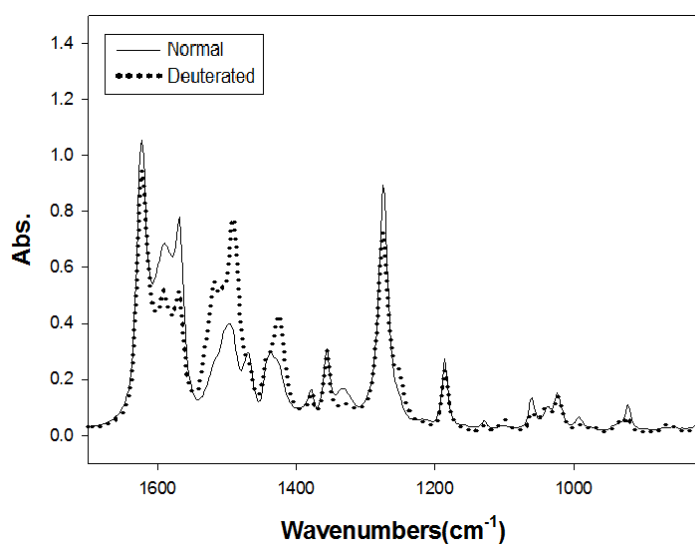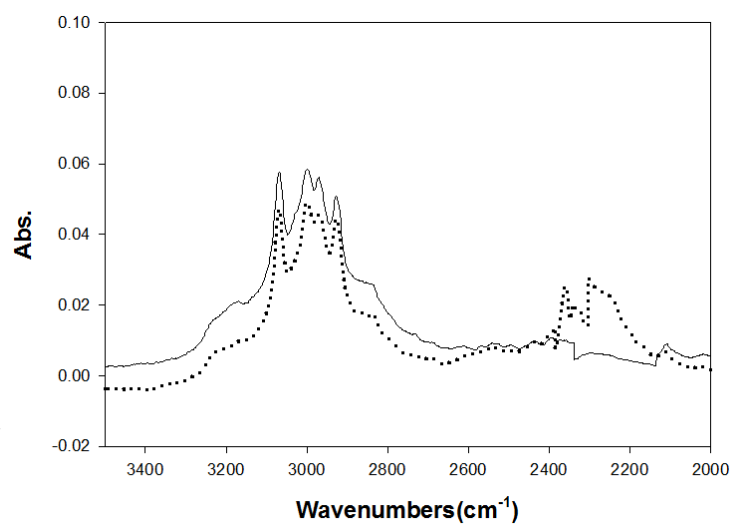

**S11.** IR spectrum of compound **10**.

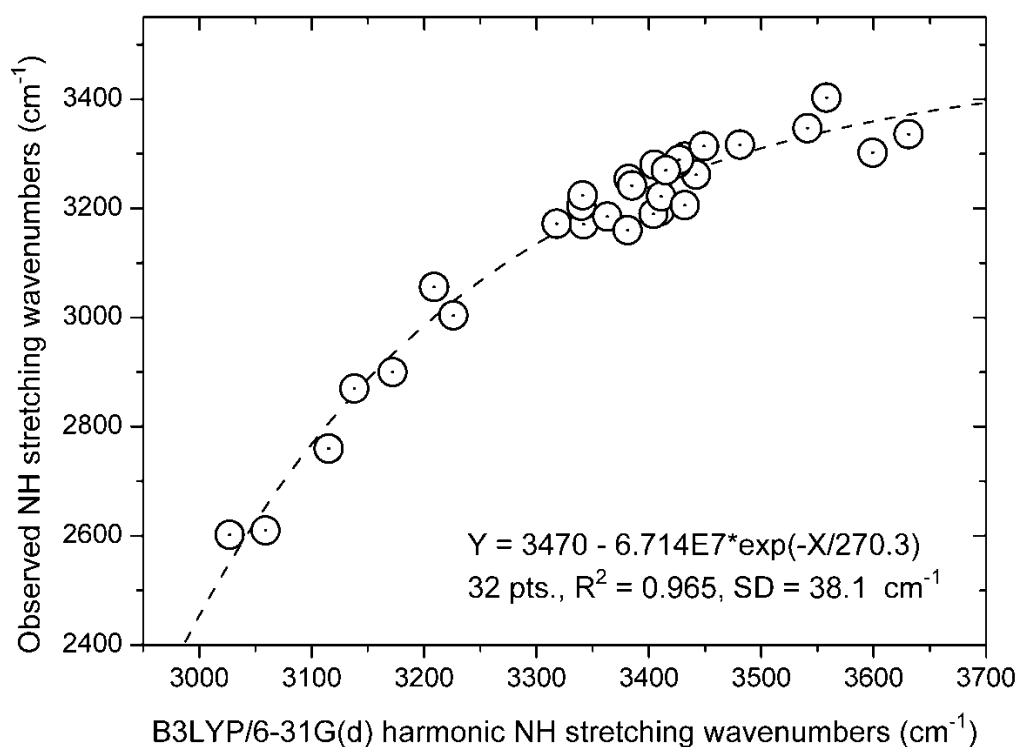

**S12.** Observed NH stretching wavenumbers ( $\text{cm}^{-1}$ ) vs. harmonic values computed with B3LYP/6-31G(d). The points for compounds **25** and **26** are omitted and are not included in the correlation analysis.

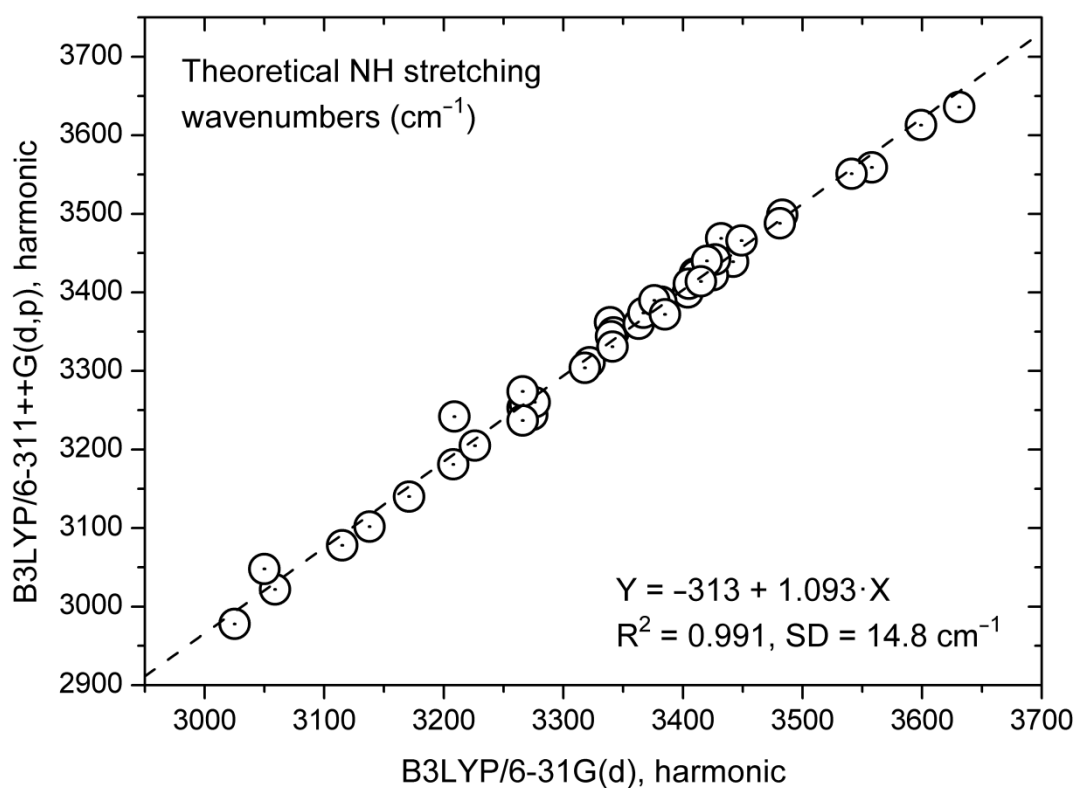

**S13.** Harmonic NH stretching wavenumbers ( $\text{cm}^{-1}$ ) computed with B3LYP/6-311++G(d,p) against those obtained with B3LYP/6-31G(d).

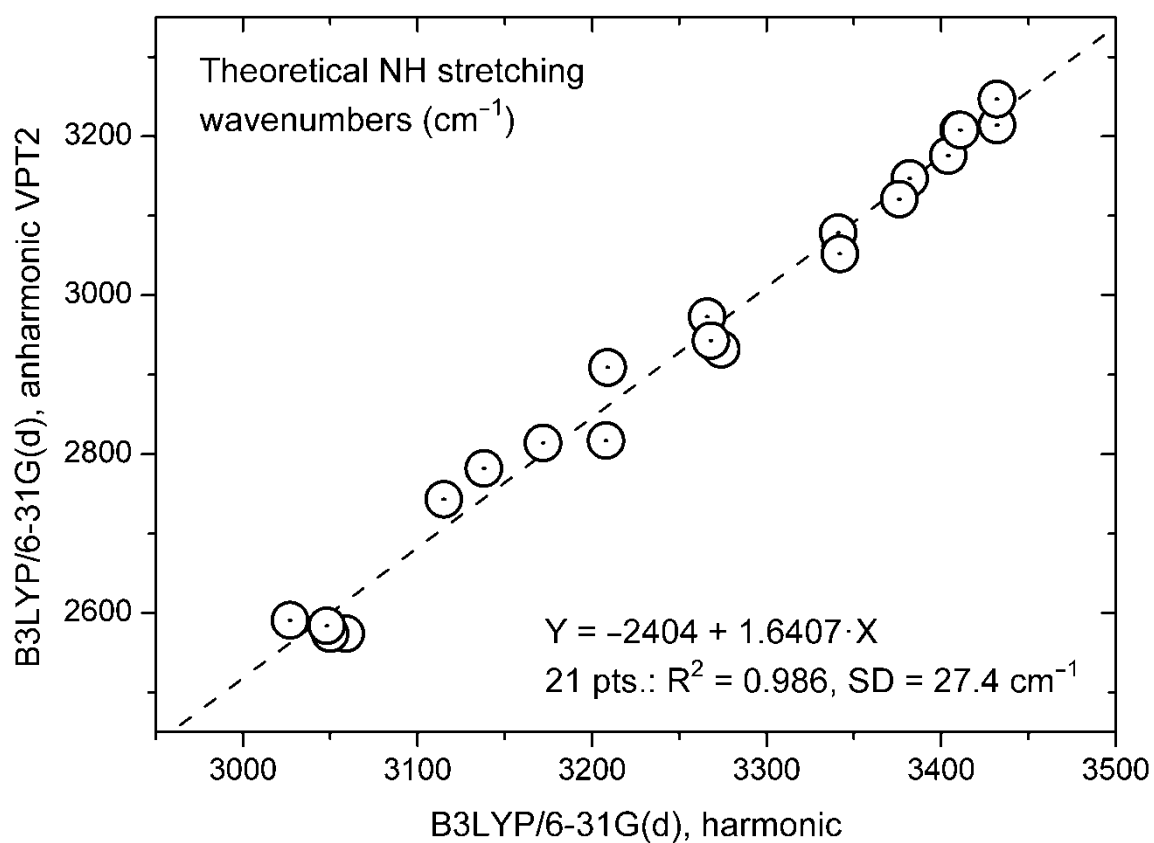

**S14.** B3LYP/6-31G(d) anharmonic VPT2 wavenumbers ( $\text{cm}^{-1}$ ) vs. the corresponding harmonic ones.

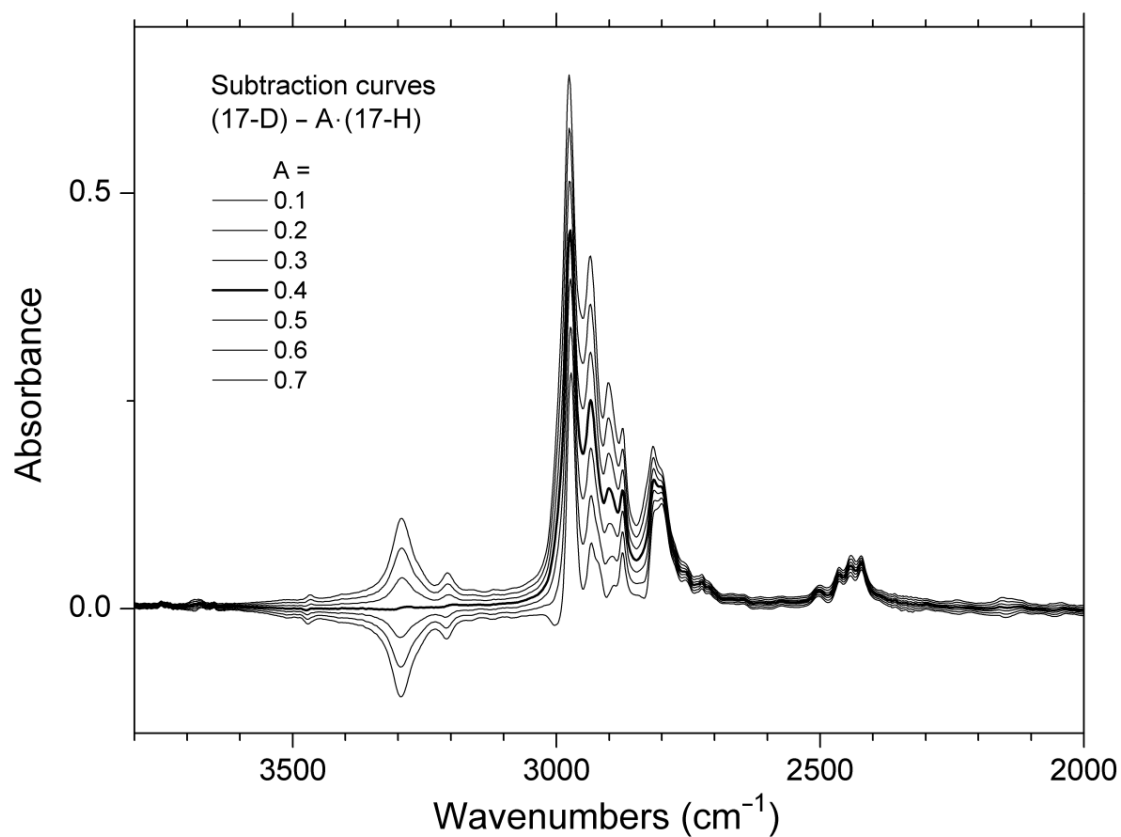

**S15.** Subtraction IR spectra of compound **17**.



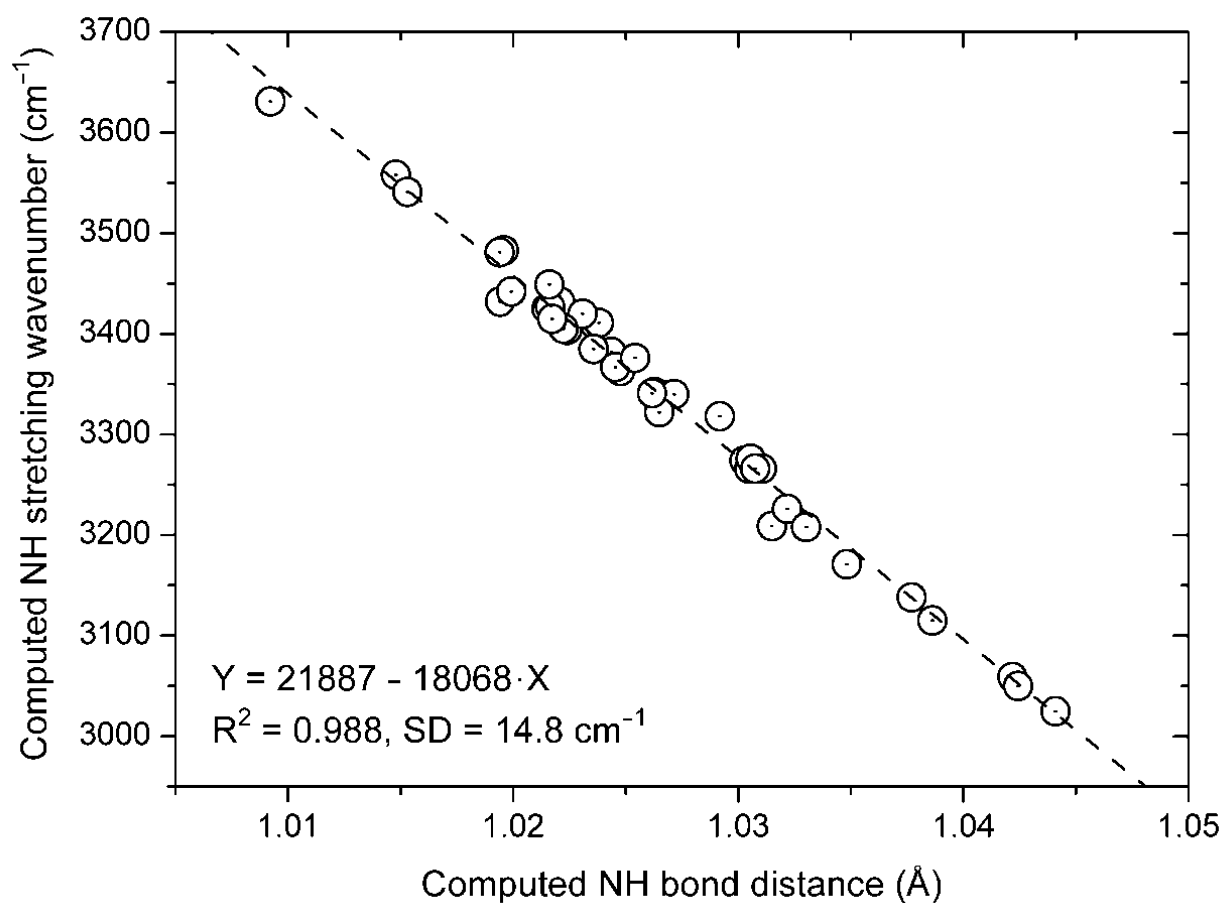

**S16.** Harmonic NH stretching wavenumbers vs. NH bond distances (B3LYP/6-31G(d)).

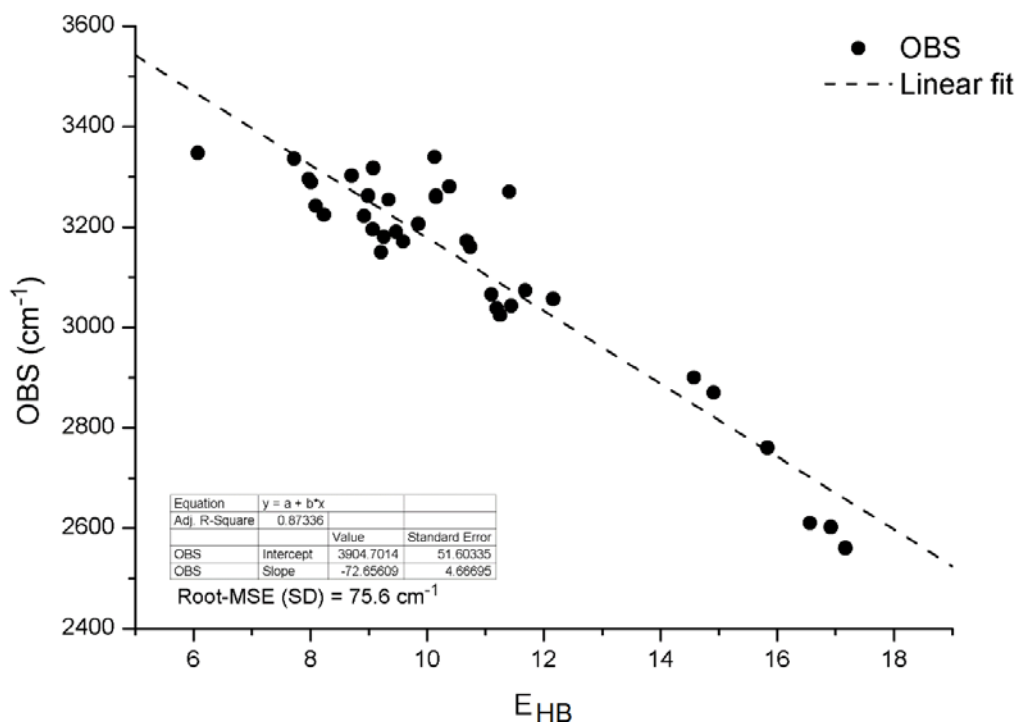

**S17.** Observed NH stretching wavenumbers vs. hydrogen bond energies,  $E_{\text{HB}}$  (kcal/mol), estimated according to E. Espinosa, E. Molins, C. Lecomte, Hydrogen bond strengths revealed by topological analyses of experimentally observed electron densities, Chem. Phys. Lett. 285 (1998) 170–173.

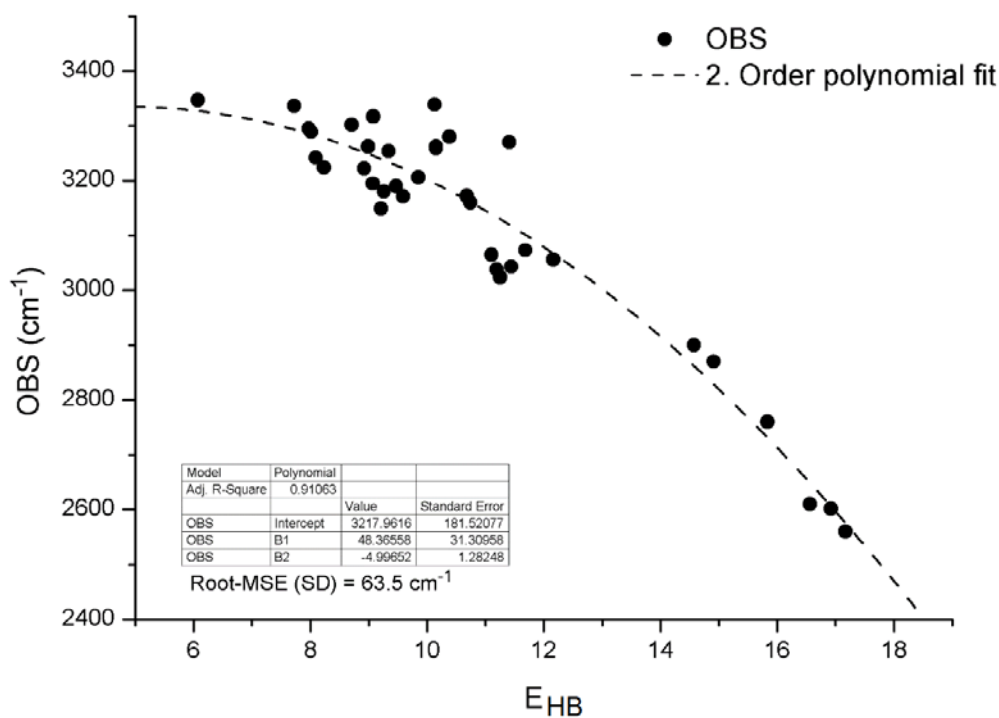

**S18.** Observed NH stretching wavenumbers vs. hydrogen bond energies,  $E_{\text{HB}}$  (kcal/mol), estimated according to E. Espinosa, E. Molins, C. Lecomte, Hydrogen bond strengths revealed by topological analyses of experimentally observed electron densities, Chem. Phys. Lett. 285 (1998) 170–173.

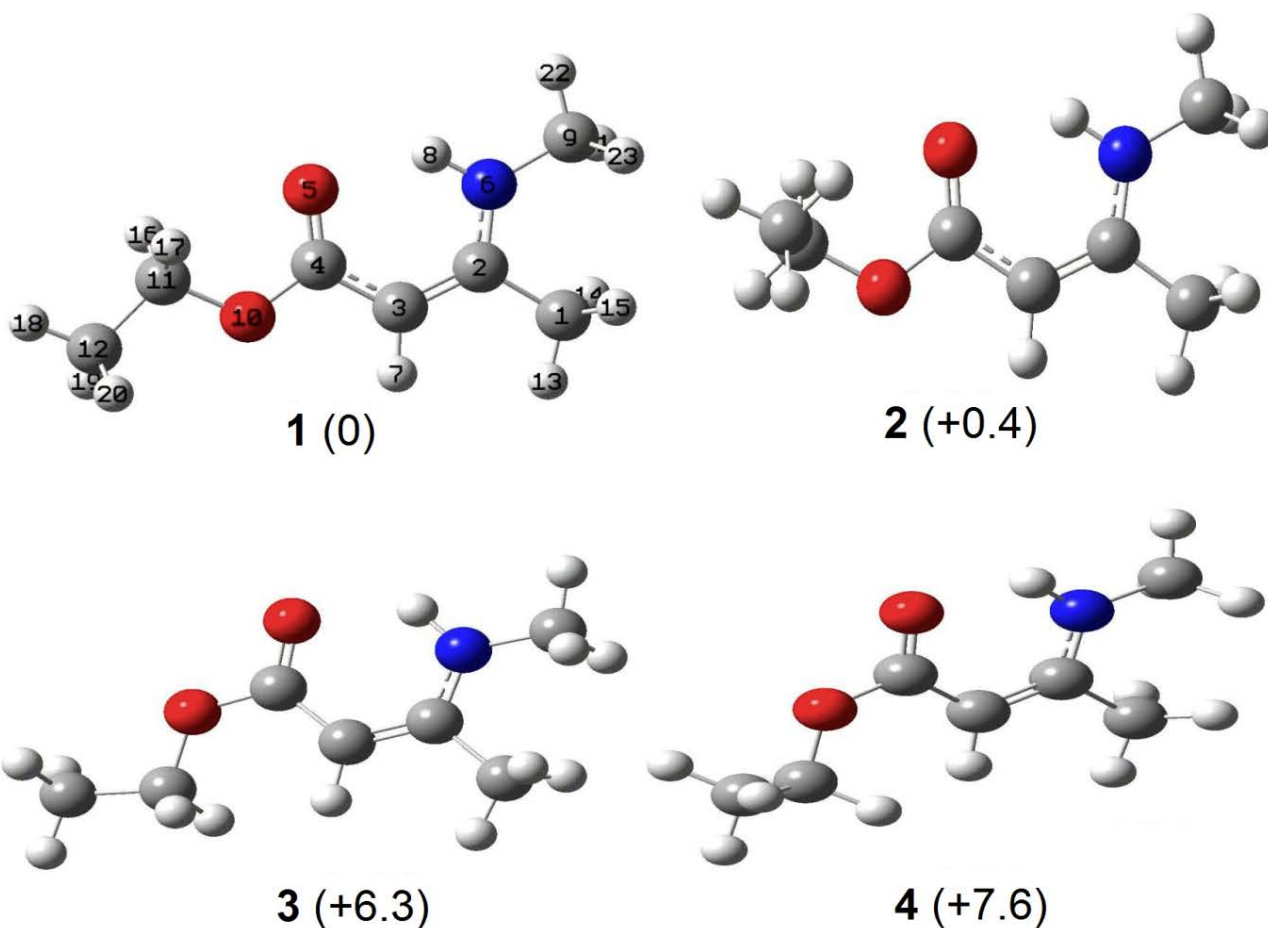

**S19.** Optimized molecular structures of (Z)-ethyl 3-(methylamino)but-2-enoate (**17**) computed with B3LYP/6-311++G(d,p) with relative energies in kcal/mol. The same harmonic NH stretching wavenumber is computed for all four structures,  $3469\text{ cm}^{-1}$ . Two low-energy conformers, **1** and **2**, may coexist. This is consistent with previously reported results for  $\beta$ -keto esters by Tayyari et al. {1,2}.

{1} Tayyari, S.F.; Chahkandi, V.; Mehrani, S.; McClurg, R.W.; Keyes, C.A.; Sammelson, R.E. Conformational analysis, tautomerization, IR, Raman, and NMR studies of ethyl benzoylacetate. *J. Mol. Struct.* **2012**, *1015*, 74-85.

{2} Tayyari, S.F.; Naghavi, F.; Pojhan, S.; McClurg, R.W.; Sammelson, R.E. Conformational analysis, tautomerization, IR, Raman, and NMR studies of benzyl acetoacetate. *J. Mol. Struct.* **2011**, *987*, 241-254.

**S20.** Fundamental band assignments for **17** (17-H) and deuterated **17** (17-D).

**17-H.** Fundamental band assignments for **17**, conformations 1 and 2 (S19). **Freq.**, harmonic wavenumber in  $\text{cm}^{-1}$  (B3LYP/6-311++G(d,p)); **Int.**, corresponding IR intensity in  $\text{km/mol}$ ; **Expt.**, wavenumber in  $\text{cm}^{-1}$  measured in  $\text{CCl}_4$ , relative intensity in parenthesis (s, strong; m, medium; w, weak; vw, very weak; sh, shoulder); **Assignment** (approximate):  $\nu$ , stretching;  $\delta$ , in-plane bending;  $\rho$ , in-plane rocking;  $\pi$ , out-of-plane bending; a, antisymmetric; s, symmetric; sci, scissor;  $\Delta$ , in-plane chelated ring deformation;  $\tau$ , torsion; for atom numbering, see S19, structure 1.

|    | Conformation 1 |      | Conformation 2 |      | Expt.    | Assignment                                                                                                                           |
|----|----------------|------|----------------|------|----------|--------------------------------------------------------------------------------------------------------------------------------------|
|    | Freq.          | Int. | Freq.          | Int. |          |                                                                                                                                      |
|    |                |      |                |      | 3465(w)  | Summation band                                                                                                                       |
| 1  | 3469           | 109  | 3469           | 110  | 3295(m)  | $\nu\text{NH}$                                                                                                                       |
| 2  | 3220           | 2    | 3222           | 2    | 3209(w)  | $\nu\text{CH}_7$                                                                                                                     |
| 3  | 3136           | 11   | 3136           | 10   | 2983(m)  | $\nu\text{aC1H}_3$                                                                                                                   |
| 4  | 3121           | 17   | 3120           | 17   | do.      | $\nu\text{aC9H}_3$                                                                                                                   |
| 5  | 3110           | 43   | 3124           | 30   | 2956(sh) | $\nu\text{aC12H}_3$ , $\nu\text{aCH}_2$                                                                                              |
| 6  | 3099           | 31   | 3104           | 12   | do.      | $\nu\text{aC12H}_3$ , $\nu\text{sCH}_2$                                                                                              |
| 7  | 3078           | 14   | 3077           | 13   | 2938(m)  | $\nu\text{aC1H}_3$                                                                                                                   |
| 8  | 3077           | 6    | 3092           | 30   | do.      | $\nu\text{aCH}_2$ , $\nu\text{aC12H}_3$                                                                                              |
| 9  |                |      | 3064           | 35   | do.      | $\nu\text{sCH}_2$                                                                                                                    |
| 10 | 3048           | 32   | 3052           | 33   | 2899(m)  | $\nu\text{aC9H}_3$                                                                                                                   |
|    | 3043           | 21   |                |      | do.      | $\nu\text{sCH}_2$                                                                                                                    |
| 11 | 3033           | 23   | 3031           | 21   | 2870(sh) | $\nu\text{sC12H}_3$                                                                                                                  |
| 12 | 3031           | 25   | 3030           | 26   | do.      | $\nu\text{sC1H}_3$                                                                                                                   |
| 13 | 3006           | 80   | 3004           | 81   | 2826(w)  | $\nu\text{sC9H}_3$                                                                                                                   |
| 14 | 1685           | 331  | 1685           | 303  | 1650(s)  | $\nu\text{aO}=\text{C}-\text{C}=\text{C}$ , $\delta\text{CH}_7$ , $\nu\text{aN}-\text{C}-\text{C}-\text{C}$                          |
| 15 | 1657           | 522  | 1657           | 530  | 1615(s)  | $\delta\text{NH}$ , $\nu\text{sO}=\text{C}-\text{C}=\text{C}$ , $\nu\text{sN}-\text{C}-\text{C}-\text{C}$                            |
| 16 | 1540           | 90   | 1539           | 102  | 1506(m)  | $\nu\text{aN}-\text{C}=\text{C}-\text{C}$ , $\delta\text{CH}_7$ , $\delta\text{NH}$ , $\delta\text{aC9H}_3$ , $\text{sciCH}_2$       |
| 17 | 1521           | 3    |                |      |          | $\text{sciCH}_2$ , $\delta\text{aC12H}_3$                                                                                            |
|    |                |      | 1509           | 21   | 1445(m)  | $\delta\text{aC9H}_3$ , $\text{sciCH}_2$ , $\delta\text{aC12H}_3$                                                                    |
| 18 | 1508           | 17   |                |      | do.      | $\delta\text{aC9H}_3$ , $\delta\text{CH}_7$ , $\delta\text{NH}$ , $\nu\text{aN}-\text{C}=\text{C}-\text{C}$ , $\text{sciCH}_2$       |
|    |                |      | 1505           | 3    | do.      | $\delta\text{aC12H}_3$ , $\delta\text{CH}_7$ , $\delta\text{NH}$ , $\nu\text{aN}-\text{C}=\text{C}-\text{C}$ , $\text{sciCH}_2$      |
| 19 | 1499           | 4    | 1490           | 16   | 1435(m)  | $\delta\text{aC12H}_3$ , $\text{sciCH}_2$                                                                                            |
| 20 | 1498           | 19   | 1496           | 18   | do.      | $\delta\text{aC1H}_3$ , $\delta\text{aC9H}_3$                                                                                        |
| 21 | 1490           | 41   | 1487           | 17   | do.      | $\delta\text{aC1H}_3$ , $\delta\text{NH}$ , $\delta\text{aC9H}_3$                                                                    |
| 22 | 1485           | 7    | 1485           | 19   | do.      | $\delta\text{aC12H}_3$                                                                                                               |
| 23 | 1479           | 1    | 1478           | 1    |          | $\delta\text{aC1H}_3$ , $\delta\text{aC9H}_3$                                                                                        |
| 24 | 1473           | 18   | 1470           | 20   | do.      | $\delta\text{sC9H}_3$ , $\delta\text{NH}$ , $\delta\text{aC1H}_3$                                                                    |
| 25 | 1424           | 0    | 1422           | 46   | 1380(m)  | $\delta\text{aC12H}_3$ , $\text{WCH}_2$ , $\delta\text{sC1H}_3$                                                                      |
| 26 | 1421           | 53   | 1417           | 10   | do.      | $\delta\text{sC1H}_3$ , $\delta\text{NH}$ , $\delta\text{sC12H}_3$ , $\text{WCH}_2$                                                  |
| 27 | 1396           | 3    | 1398           | 5    | do.      | $\delta\text{sC12H}_3$ , $\text{WCH}_2$ , $\delta\text{NH}$ , $\nu\text{sC}=\text{C}$                                                |
| 29 | 1391           | 75   | 1391           | 89   | 1360(m)  | $\rho\text{NH}$ , $\delta\text{sCH}_3$ , $\text{WCH}_2$ , $\delta\text{CH}_7$ , $\nu\text{aC}=\text{C}-\text{N}$                     |
| 29 |                |      | 1333           | 29   | 1301(sh) | $\text{WCH}_2$                                                                                                                       |
| 30 | 1298           | 569  | 1298           | 469  | 1270(s)  | $\delta\text{CH}_7$ , $\nu\text{aO10C4C3}$ , $\nu\text{sN}-\text{C}=\text{C}-\text{C}$ , $\nu\text{C2}-\text{CH}_3$ , $\text{wCH}_2$ |
|    | 1293           | 1    |                |      |          | $\tau\text{CH}_2$ , $\pi\text{C12H}_3$                                                                                               |
| 31 | 1197           | 130  | 1196           | 159  | 1175(s)  | $\delta\text{CH}_7$ , $\nu\text{N}-\text{CH}_3$ , $\nu\text{aC}-\text{O}-\text{CH}_2$                                                |
| 32 | 1190           | 322  | 1194           | 21   | do.      | $\delta\text{CH}_7$ , $\nu\text{N}-\text{CH}_3$ , $\rho\text{C9H}_3$ , $\nu\text{aC}-\text{O}-\text{CH}_2$                           |

|    |      |     |      |     |          |                                                                                                                                                   |
|----|------|-----|------|-----|----------|---------------------------------------------------------------------------------------------------------------------------------------------------|
| 33 |      |     | 1186 | 235 | 1165(m)  | $\delta\text{CH}_7$ , $\nu\text{N-CH}_3$ , $\rho\text{C}_9\text{H}_3$ , $\nu\text{C-O-CH}_2$                                                      |
|    | 1176 | 3   |      |     |          | $\rho\text{CH}_2$ , $\rho\text{C}_{12}\text{H}_3$                                                                                                 |
| 34 | 1141 | 0   | 1139 | 5   | 1140(sh) | $\pi\text{C}_9\text{H}_3$                                                                                                                         |
| 35 | 1134 | 4   |      |     | do.      | $\rho\text{C}_{12}\text{H}_3$ , $\delta\text{O-CH}_2\text{-CH}_3$                                                                                 |
|    |      |     | 1115 | 51  | 1097(w)  | $\rho\text{C}_{12}\text{H}_3$                                                                                                                     |
| 36 | 1105 | 45  | 1105 | 54  | 1083(m)  | $\rho\text{NH}$ , $\nu\text{N-CH}_3$ , $\rho\text{C}_9\text{H}_3$                                                                                 |
| 37 | 1076 | 140 | 1068 | 97  | 1058(m)  | $\nu\text{aOCH}_2\text{-C}_{12}\text{H}_3$ , $\nu\text{sC}_3\text{-C}_4\text{-O-CH}_2$ , $\nu\text{C}_2\text{-CH}_3$ , $\rho\text{C}_9\text{H}_3$ |
| 38 | 1057 | 2   | 1057 | 3   | 1033(w)  | $\pi\text{C}_1\text{H}_3$                                                                                                                         |
| 39 | 1029 | 6   | 1022 | 12  | 1011(w)  | $\rho\text{C}_1\text{H}_3$ , $\nu\text{aO-CH}_2\text{-C}_{12}\text{H}_3$                                                                          |
| 40 | 993  | 21  |      |     | 977(w)   | $\rho\text{C}_1\text{H}_3$ , $\nu\text{sC-O-CH}_2$ , $\delta\text{C}_2\text{C}_3\text{C}_4$ , $\nu\text{C-C}_{12}\text{H}_3$                      |
|    |      |     | 974  | 19  | 967(w)   | $\rho\text{C}_1\text{H}_3$ , $\nu\text{sC-O-CH}_2$ , $\delta\text{C}_2\text{C}_3\text{C}_4$ , $\nu\text{C-C}_{12}\text{H}_3$                      |
| 41 | 898  | 1   | 889  | 1   |          | $\rho\text{C}_{12}\text{H}_3$ , $\nu\text{sC-O-CH}_2$ , $\delta\text{C}_2\text{C}_3\text{C}_4$                                                    |
| 42 | 838  | 6   | 836  | 5   | 825(w)   | $\Delta$ , $\nu\text{N-C}_9\text{H}_3$ , $\nu\text{C-C}_1\text{H}_3$ , $\rho\text{C}_{12}\text{H}_3$                                              |

17-D. Fundamental band assignments for deuterated **17**. See heading to previous Table.

|    | Conformation 1 |      | Conformation 2 |      | Expt.     | Assignment                                                                          |
|----|----------------|------|----------------|------|-----------|-------------------------------------------------------------------------------------|
|    | Freq.          | Int. | Freq.          | Int. |           |                                                                                     |
| 1  | 3137           | 11   | 3136           | 11   | 2982(m)   | $\nu\text{aC}_1\text{H}_3$                                                          |
| 2  | 3121           | 16   | 3120           | 16   | do.       | $\nu\text{aC}_9\text{H}_3$                                                          |
| 3  | 3109           | 43   | 3124           | 30   | 2955(sh)  | $\nu\text{aC}_{12}\text{H}_3$ , $\nu\text{aCH}_2$                                   |
| 4  | 3099           | 31   | 3104           | 12   | do.       | $\nu\text{aC}_{12}\text{H}_3$ , $\nu\text{sCH}_2$                                   |
| 5  | 3078           | 14   | 3077           | 13   | 2938(m)   | $\nu\text{aC}_1\text{H}_3$                                                          |
| 6  | 3076           | 6    | 3092           | 30   | do.       | $\nu\text{aCH}_2$ , $\nu\text{aC}_{12}\text{H}_3$                                   |
| 7  |                |      | 3064           | 35   | do.       | $\nu\text{sCH}_2$                                                                   |
| 8  | 3048           | 32   | 3052           | 32   | 2900(sh)  | $\nu\text{aC}_9\text{H}_3$                                                          |
|    | 3043           | 21   |                |      | do.       | $\nu\text{sCH}_2$                                                                   |
| 9  | 3033           | 23   | 3031           | 21   | 2870(sh)  | $\nu\text{sC}_{12}\text{H}_3$                                                       |
| 10 | 3031           | 26   | 3030           | 26   | do.       | $\nu\text{sC}_1\text{H}_3$                                                          |
| 11 | 3007           | 77   | 3004           | 78   | 2815(w)   | $\nu\text{sC}_9\text{H}_3$                                                          |
| 12 | 2545           | 71   | 2545           | 72   | 2431(w)   | $\nu\text{ND}$                                                                      |
| 13 | 2379           | 1    | 2380           | 1    | 2240(w)   | $\nu\text{CD}_7$                                                                    |
| 14 | 1679           | 316  |                |      | 1652(s)   | $\nu\text{aO=C-C=C}$ , $\nu\text{aN-C-C-C}$                                         |
|    |                |      | 1679           | 291  | do.       | $\nu\text{aO=C-C=C}$ , $\nu\text{sN-C-C-C}$                                         |
| 15 | 1597           | 601  | 1596           | 611  | 1560(s)   | $\nu\text{sO=C-C=C}$ , $\delta\text{ND}$ , $\nu\text{sN-C-C-C}$                     |
| 16 | 1522           | 18   | 1519           | 28   | 1506 (vw) | $\delta\text{aC}_{12}\text{H}_3$ , $\delta\text{aC}_9\text{H}_3$ , $\text{sciCH}_2$ |
| 17 | 1518           | 11   | 1506           | 15   | do.       | $\text{sciCH}_2$ , $\delta\text{aC}_9\text{H}_3$ , $\delta\text{aC}_{12}\text{H}_3$ |
| 18 | 1499           | 4    | 1494           | 28   | 1440(sh)  | $\delta\text{aC}_{12}\text{H}_3$ , $\text{sciC}_2\text{H}_2$                        |
| 19 | 1498           | 19   | 1496           | 18   | do.       | $\delta\text{aC}_1\text{H}_3$ , $\delta\text{aC}_9\text{H}_3$                       |
| 20 | 1491           | 17   | 1487           | 6    | do.       | $\delta\text{sC}_9\text{H}_3$ , $\nu\text{CN}$ , $\text{sciCH}_2$                   |
| 21 | 1485           | 7    | 1485           | 8    | do.       | $\delta\text{aC}_{12}\text{H}_3$ , $\text{sciCH}_2$                                 |
| 22 | 1480           | 103  | 1479           | 50   | 1435(m)   | $\delta\text{aC}_1\text{H}_3$                                                       |
| 23 | 1478           | 1    | 1477           | 48   | do.       | $\delta\text{aC}_1\text{H}_3$ , $\delta\text{aC}_9\text{H}_3$                       |
| 24 | 1452           | 35   | 1450           | 32   | 1421(w)   | $\delta\text{sC}_9\text{H}_3$ , $\delta\text{SC}_1\text{H}_3$                       |
| 25 | 1423           | 2    | 1418           | 9    | 1380(w)   | $\delta\text{sC}_{12}\text{H}_3$ , $\text{WCH}_2$ , $\delta\text{sC}_1\text{H}_3$   |
| 26 | 1412           | 2    | 1411           | 3    | 1370(w)   | $\delta\text{sC}_1\text{H}_3$ , $\delta\text{sC}_{12}\text{H}_3$                    |

|    |      |     |      |     |          |                                                                       |
|----|------|-----|------|-----|----------|-----------------------------------------------------------------------|
| 27 | 1394 | 5   | 1396 | 14  | 1360(w)  | $\delta sC12H_3$ , $wCH_2$                                            |
| 28 |      |     | 1333 | 26  | 1326(w)  | $wCH_2$                                                               |
|    | 1293 | 1   |      |     | 1302(vw) | $wCH_2$                                                               |
| 29 | 1279 | 768 | 1278 | 638 | 1270(s)  | $\nu aO10C4C3$ , $\nu sN-C=C-C$ , $\nu C2-CH_3$ , $wCH_2$ , $\rho ND$ |
| 30 | 1228 | 161 | 1228 | 138 | 1255(s)  | $\rho ND$ , $\nu N-C9H_3$ , $\delta C2C3C4$ , $\nu aC-O-CH_2$         |
| 31 |      |     | 1194 | 45  | 1175(sh) | $\rho CH_2$                                                           |
| 32 | 1179 | 54  | 1176 | 39  | 1165(m)  | $\rho C9H_3$                                                          |
|    | 1176 | 3   |      |     | do.      | $\rho CH_2$ , $\rho C12H_3$                                           |
| 33 | 1137 | 0   | 1136 | 5   | do.      | $\nu N-C9H_3$                                                         |
| 34 | 1134 | 4   |      |     | do.      | $\rho C12H_3$ , $\delta O-CH_2-CH_3$                                  |
|    |      |     | 1115 | 83  | 1095(m)  | $\rho C12H_3$ , $\delta O-CH_2-CH_3$                                  |
| 35 | 1095 | 206 |      |     | 1066(m)  | $\rho C1H_3$ , $\nu aC-O-CH_2$ , $\delta CD7$                         |
|    |      |     | 1086 | 130 | do.      | $\rho C1H_3$ , $\nu aC-O-CH_2$                                        |
| 36 | 1055 | 2   | 1055 | 2   | 1054(w)  | $\pi C1H_3$                                                           |
| 37 | 1037 | 21  |      |     | 1033(vw) | $\rho C1H_3$ , $\nu aO-CH_2-CH_3$ , $\delta C2C3C4$ , $\nu CCH_3$     |
|    |      |     | 1028 | 27  | 1010(vw) | $\rho C1H_3$ , $\nu aO-CH_2-CH_3$ , $\delta C2C3C4$ , $\nu CCH_3$     |
| 38 | 991  | 34  |      |     | 998(sh)  | $\rho C1H_3$ , $\nu sC-O-CH_2$ , $\delta C2C3C4$ , $\nu CCH_3$        |
|    |      |     | 974  | 31  | 975(w)   | $\rho C1H_3$ , $\nu sC-O-CH_2$ , $\delta C2C3C4$ , $\nu CCH_3$        |
| 39 | 961  | 5   | 962  | 6   | 964(w)   | $\delta ND$ , $\nu N-C9H_3$                                           |
| 40 | 920  | 3   | 918  | 1   | 930(vw)  | $\delta CD7$ , $\delta C-O-CH_2$ , $\delta C2C3C4$ , $\rho C12H_3$    |

#### Notes:

The observed IR bands in non-deuterated **17** at 967(w), 1097(w), 1165(m), and 1301(sh)  $cm^{-1}$  may be due to the presence of conformation 2. The NH stretching of **17** is observed at 3295  $cm^{-1}$ , on deuteration the band is observed at 2431  $cm^{-1}$  (**S3**, **S15**). The corresponding NH band in 4-methylamino-3-penten-2-one, APO-NMe, was observed at 3171  $cm^{-1}$  by H. Raissi et al. {3}. This value indicates that the IHB strength of **17** is weaker than that of APO-NMe. Hence, replacement of the  $\beta$ -methyl group in APO-NMe with an OEt group (to yield **17**) decreases the IHB strength. - The spectrum of **17** in  $CCl_4$  shows a weak band at 3465  $cm^{-1}$ , this may be a summation band. In 4-amino-3-penten-2-one, APO, a corresponding band is seen at 3240  $cm^{-1}$  {4}.

{3} Raissi, H.; Moshfeghi, E.; Farzad, F.; Vibrational assignment, structure and intramolecular hydrogen bond of 4-methylamino-3-penten-2-one. *Spectrochim. Acta A* **2005**, 62, 1004-1015.

{4} Tayyari, S.F.; Raissi, H.; Tayyari, F. Vibrational assignment of 4-amino-3-penten-2-one. *Spectrochim. Acta A* **2002**, 58, 1681-1695.

## S21. Materials section: Synthesis, characterization, and NMR spectra.

All chemicals, unless stated otherwise, were purchased from Sigma-Aldrich, TCI, Chemicals and Alfa Aesar and were used without further purification. Solvents used were HPLC grade and dried on molecular sieves (4 Å) at least 2 days before use. Analytical thin-layer chromatography was done on Merck Alufolien SiO<sub>2</sub> 60 F254 0.2 mm thick precoated TLC plates. Column chromatography was performed using SiO<sub>2</sub> from VWR 40–63 µm. <sup>1</sup>H and <sup>13</sup>C NMR spectra were recorded on a Bruker 500 MHz Ultrashield Plus 500 spectrometer. <sup>1</sup>H, <sup>13</sup>C, and <sup>19</sup>F NMR spectra were also recorded at 500, 125, and 470 MHz, respectively, on a Bruker Avance 3 spectrometer with a BBFO probe. All chemical shifts (δ) are quoted in ppm, and all coupling constants (J) are in Hertz (Hz). The following abbreviations are used for multiplicity for NMR resonances: s = singlet, bs = broad singlet, d = doublet, t = triplet, q = quartet and m = multiplet. HRMS LC/MS were recorded on a Dionex Acclaim RSLC 120 C18 2.2 µm 120 Å 2.150 mm column maintained at 40 °C carried out on a Bruker MicrOTOF-QII-system with ESI system.

Compounds **6**, **14**, **16**, **17**, **19**, and **45** were prepared by a modified procedure based on Martin, D.F.; Janusonis, G.A.; Martin, B.B. Stabilities of Bivalent Metal Complexes of some B-Ketoimines, *J. Am. Chem. Soc.* **1961**, *83*, 73-75.

*Modified procedure:* To a stirred solution of 1,3-dicarbonyl compound (5.0 mmol of 2,4-pentanedione, 3-methyl-2,4-pentanedione, ethyl 2-acetoacetate or ethyl 2-methylacetoacetate) and amine (5.0 mmol of methylamine or anilines) in absolute ethanol (15 mL) was added glacial acetic acid (0.01 mL) at room temperature. The reaction mixture was stirred at 80 °C and the progress of the reaction was monitored by TLC. After complete conversion of the starting material, the solvent was removed under reduced pressure and the crude product was purified by column chromatography using silica gel using a gradient of organic solvents as eluent. Evaporation of solvent under reduced pressure affords the pure compound.

The synthesis of **8**, **9**, **10**, and **11** has been described in Zheglova, D.Kh.; Genov, D.G.; Bolvig, S.; Hansen, P.E. Deuterium Isotope Effects on <sup>13</sup>C Chemical Shifts of Enaminones. *Acta Chem. Scand.* **1997**, *51*, 1016-1023. Additional <sup>13</sup>C NMR data and high resolution MS data are given below .

### (Z)-4-(phenylamino)pent-3-en-2-one **6**:

The compound was isolated as a pale yellow solid after flash column chromatography on silica using dichloromethane/ethyl acetate (20:1) as eluent. In 94% yield. <sup>1</sup>H NMR (500 MHz, CDCl<sub>3</sub>): δ 12.45 (brs, 1H, NH), 7.34-7.31 (m, 2H), 7.19-7.16 (m, 1H), 7.10-7.09 (m, 2H), 5.18 (s, 1H), 2.09 (s, 3H), 1.98 (s, 3H). <sup>13</sup>C NMR (125 MHz, CDCl<sub>3</sub>): δ 196.23, 160.36, 138.83, 129.18, 125.65, 124.84, 97.70, 29.26, 19.93. NMR results are similar to those of Ref. [i]. HRMS-ESI (m/z): [M + H]<sup>+</sup> calcd. for C<sub>11</sub>H<sub>14</sub>NO: 176.0997, found: 176.0949.

### (Z)-4-(o-tolylamino)pent-3-en-2-one **8**:

<sup>1</sup>H NMR (500 MHz, CDCl<sub>3</sub>): δ 12.33 (brs, 1H, NH), 7.23-7.21 (m, 1H), 7.17-7.13 (m, 2H), 7.08-7.06 (m, 1H), 5.19 (s, 1H), 2.28 (s, 3H), 2.10 (s, 3H), 1.86 (s, 3H). <sup>13</sup>C NMR (125 MHz, CDCl<sub>3</sub>): δ 196.12, 161.26, 137.58, 133.80, 130.87, 130.87, 126.48, 126.48, 97.12, 29.16, 19.70, 18.15. The NMR results are similar to those of Ref. [ii]. HRMS-ESI (m/z): [M + H]<sup>+</sup> calcd. for C<sub>11</sub>H<sub>14</sub>NO: 176.0997, found: 176.0949.

### (Z)-4-(2-fluorophenylamino)pent-3-en-2-one **9**:

<sup>1</sup>H NMR (500 MHz, CDCl<sub>3</sub>): δ 12.23 (brs, 1H, NH), 7.17 (m, 2H), 7.12 (m, 2H), 5.26 (s, 1H), 2.11 (s, 3H), 1.94 (s, 3H). <sup>13</sup>C NMR (125 MHz, CDCl<sub>3</sub>): δ 196.88, 160.61, 156.80 (J=247.5), 127.26 (J=7.61), 127.14, 127.04 (J=12.45), 124.44 (J=4.34), 116.39 (J=20.19), 98.26, 29.34, 19.60. NMR results are similar to those of Refs. [i] and [46]. <sup>19</sup>F NMR (470 MHz, CDCl<sub>3</sub>): δ 123.65 ppm (Reference hexafluorobenzene). HRMS-ESI (m/z): [M + H]<sup>+</sup> calcd. for C<sub>11</sub>H<sub>13</sub>FNO: 194.0903, found: 194.0988.

**(Z)-4-(2-chlorophenylamino)pent-3-en-2-one 10:**

<sup>1</sup>H NMR (500 MHz, CDCl<sub>3</sub>): δ 12.42 (brs, 1H, NH), 7.46-7.44 (m, 1H), 7.25-7.20 (m, 2H), 7.17-7.14 (m, 1H), 5.27 (s, 1H), 2.13 (s, 3H), 1.95 (s, 3H). <sup>13</sup>C NMR (125 MHz, CDCl<sub>3</sub>): δ 196.87, 159.84, 136.46, 130.22, 129.98, 127.25, 126.92, 126.90, 98.52, 29.35, 19.88. HRMS-ESI (m/z): [M + H]<sup>+</sup> calcd. for C<sub>12</sub>H<sub>16</sub>ClNO: 225.0920, found, 225.0952. The <sup>13</sup>C data are different from those of Ref. [iii]. The spectrum contains a small degradation product, which is 2-chloroaniline. This proves that the compound is the correct one.

**(Z)-4-(2,6-dimethylphenylamino)pent-3-en-2-one 11:**

<sup>1</sup>H NMR (500 MHz, CDCl<sub>3</sub>): δ 11.92 (brs, 1H, NH), 7.08 (m, 3H), 5.20 (s, 1H), 2.19 (s, 3H), 2.10 (s, 3H), 1.62 (s, 3H). <sup>13</sup>C NMR (125 MHz, CDCl<sub>3</sub>): δ 195.62, 162.95, 136.64, 136.24, 135.65, 128.30, 127.51, 95.88, 29.14, 18.34. NMR results are similar to those of Ref. [i]. HRMS-ESI (m/z): [M + H]<sup>+</sup> calcd. for C<sub>13</sub>H<sub>18</sub>NO: 204.1310, found: 204.1394.

**(Z)-3-methyl-4-(methylamino)pent-3-en-2-one 14:**

The compound was isolated as a light amber oil after flash column chromatography on silica using *n*-hexane/ethyl acetate (1:1) as eluent. In 74% yield. <sup>1</sup>H NMR (500 MHz, CDCl<sub>3</sub>): δ 11.80 (brs, 1H, NH), 2.88 (d, J=5.2 Hz, 3H), 2.06 (s, 3H), 1.91 (s, 3H), 1.78 (s, 3H). The <sup>1</sup>H NMR results are similar to those of Ref. [iv]. <sup>13</sup>C NMR (125 MHz, CDCl<sub>3</sub>): δ 194.35, 163.15, 97.97, 29.84, 28.31, 14.93, 14.58. HRMS-ESI (m/z): [M + H]<sup>+</sup> calcd. for C<sub>13</sub>H<sub>18</sub>NO: 204.1310, found: 204.1394.

**(Z)-ethyl 3-(phenylamino)but-2-enoate 16:**

The compound was isolated as creamy solid after flash column chromatography on silica using dichloromethane/ethyl acetate (20:1) as eluent. In 70% yield. <sup>1</sup>H NMR (500 MHz, CDCl<sub>3</sub>): δ 10.39 (brs, 1H, NH), 7.31 (m, 2H), 7.14 (m, 1H), 7.08 (m, 2H), 4.69 (s, 1H), 4.15 (q, 2H), 1.99 (s, 3H), 1.28 (t, 3H). <sup>13</sup>C NMR (125 MHz, CDCl<sub>3</sub>): δ 170.44, 158.96, 139.42, 129.58, 124.96, 124.45, 86.13, 58.80, 20.36, 14.66. The NMR results are similar to those of Ref. [v]. HRMS-ESI (m/z): [M + H]<sup>+</sup> calcd. for C<sub>12</sub>H<sub>16</sub>NO<sub>2</sub>: 206.1181, found: 206.1172.

**(Z)-ethyl 3-(methylamino)but-2-enoate 17:**

The compound was isolated as a light amber oil after flash column chromatography on silica using *n*-hexane/ethyl acetate (1:1) as eluent. In 61% yield. <sup>1</sup>H NMR (500 MHz, CDCl<sub>3</sub>): δ 8.46 (brs, 1H, NH), 4.45 (s, 1H), 4.07 (q, 2H), 2.89 (s, 3H), 1.90 (s, 3H), 1.23 (t, 3H). <sup>13</sup>C NMR (125 MHz, CDCl<sub>3</sub>): δ 170.79, 162.91, 81.99, 58.38, 29.67, 19.28, 14.76. The NMR results are similar to those of Ref. [vi]. HRMS-ESI (m/z): [M + H]<sup>+</sup> calcd. for C<sub>7</sub>H<sub>14</sub>NO<sub>2</sub>: 144.2024.1310, found: 144.1037.

**(Z)-ethyl 2-methyl-3-(methylamino)but-2-enoate 19:**

The compound was isolated as a colorless oil after flash column chromatography on silica using *n*-hexane/ethyl acetate (1:1) as eluent. In 68% yield. <sup>1</sup>H NMR (500 MHz, CDCl<sub>3</sub>): δ 9.14 (brs, 1H, NH), 4.08 (q, J=7.1, 2H), 2.88 (d, J=5.2, 3H), 1.94 (s, 3H), 1.77 (s, 3H), 1.25 (t, J=7.1, 3H). <sup>13</sup>C NMR (125 MHz, CDCl<sub>3</sub>): δ 170.96, 160.39, 86.18, 58.48, 29.85, 14.83, 14.55, 12.51. HRMS-ESI (m/z): [M + H]<sup>+</sup> calcd. for C<sub>8</sub>H<sub>16</sub>NO<sub>2</sub>: 158.1181, found: 158.1162.

**(Z)-3-methyl-4-(phenylamino)pent-3-en-2-one 45:**

The compound was isolated as off white solid after flash column chromatography on silica using *n*-hexane/ethyl acetate (1:1) as eluent. In 78% yield. <sup>1</sup>H NMR (500 MHz, CDCl<sub>3</sub>): δ 13.44 (brs, 1H, NH), 7.28 (t, 2H), 7.12 (t, 1H), 7.02 (d, J=7.4, 2H), 2.18 (s, 3H), 1.98 (s, 3H), 1.91 (s, 3H). <sup>13</sup>C NMR (125 MHz, CDCl<sub>3</sub>): δ 196.71, 158.50, 139.63, 129.66, 125.27, 101.15, 28.87, 17.21, 15.02. The NMR results are similar to those of Ref. [vii]. HRMS-ESI (m/z): [M + H]<sup>+</sup> calcd. for C<sub>13</sub>H<sub>18</sub>NO<sub>2</sub>: 220.1337, found: 220.1348.



- i. Schilling, W.; Zhang, Y.; Sahoo, P.K.; Sarkar, S.K.; Gandhi, S.; Roesky, H.W.; Das, S. Nature inspired singlet oxygen generation to access  $\alpha$ -amino carbonyl compounds via 1,2-acyl migration. *Green Chemistry*, **2021**, *23*, 379-387.
- ii. Prabakaran, K.; Sivakumar, M.; Perumal, M.S. A Simple, Efficient Green Protocol for the Synthesis of  $\beta$ -Enaminone and Enamino Ester Derivatives by Using Onion Extract as Green Catalyst. *ChemistrySelect*, **2017**, *2*, 2363-2372.
- iii. Olejník, R.; Padělková, Z.; Horáček, M.; Růžicka, A. Structure of  $\beta$ -diketiminates and  $\beta$ -aminoketones made from anisidines or chloroanilines: tin and lithium complexes. *Main Group Metal Chemistry* **2012**, *35*, 13-27.
- iv. Mikysek, T.; Kvapilová, H.; Doušová, H.; Josefík, F.; Šimůnek, P.; Růžicková, Z.; Ludvík, J. Synthesis, electrochemical, structural and theoretical study of new derivatives of OABAN and OABAO heterocycles *Inorg. Chim. Acta* **2017**, *455*, 465-472.
- v. Qiao, W-Z.; Song, T-Q.; Cheng, P.; Zhao, B. Highly Selective Enamination of  $\beta$ -ketoesters Catalyzed by Interlocked [Cu<sub>8</sub>] and [Cu<sub>18</sub>] Nanocages. *Angew. Chem., Intern. Ed.*, **2019**, *58*, 13302-13307.
- vi. Manzi, J.A.; Knapp, C.E; Carmalt, C.J. Aerosol-Assisted Chemical-Vapour Deposition of Zinc Oxide from Single-Source  $\beta$ -Iminoesterate Precursors. *Eur. J. Inorg. Chem.*, **2015**, *22*, 3658-3665.
- vii. Chen, X.; She, J.; Shang, Z.; Wu, J.; Wu, H.; Zhang, P. Synthesis of pyrazoles, diazepines, enaminones, and enamino esters using 12-tungstophosphoric acid as a reusable catalyst in water. *Synthesis*, **2008**, *21*, 3478-3486.

## NMR:

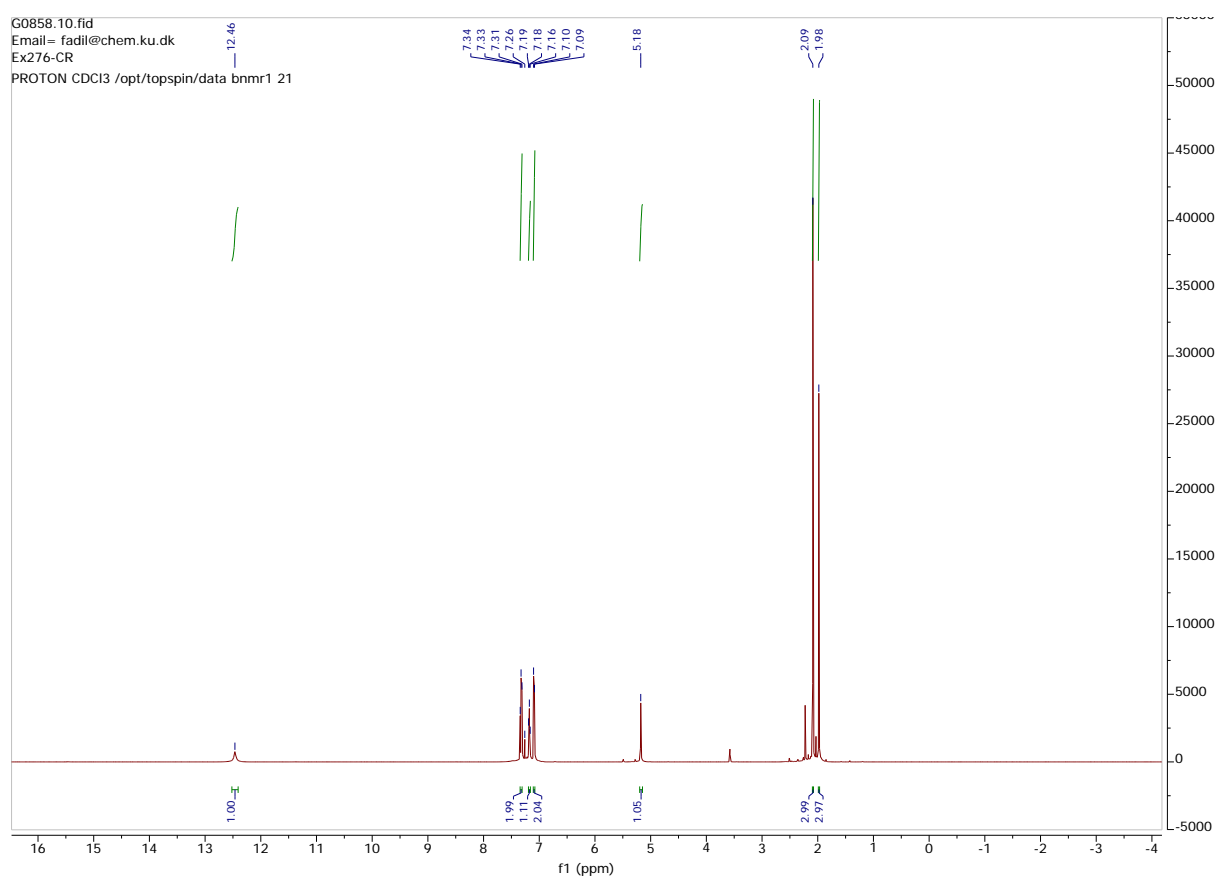

<sup>1</sup>H NMR spectrum of compound 6

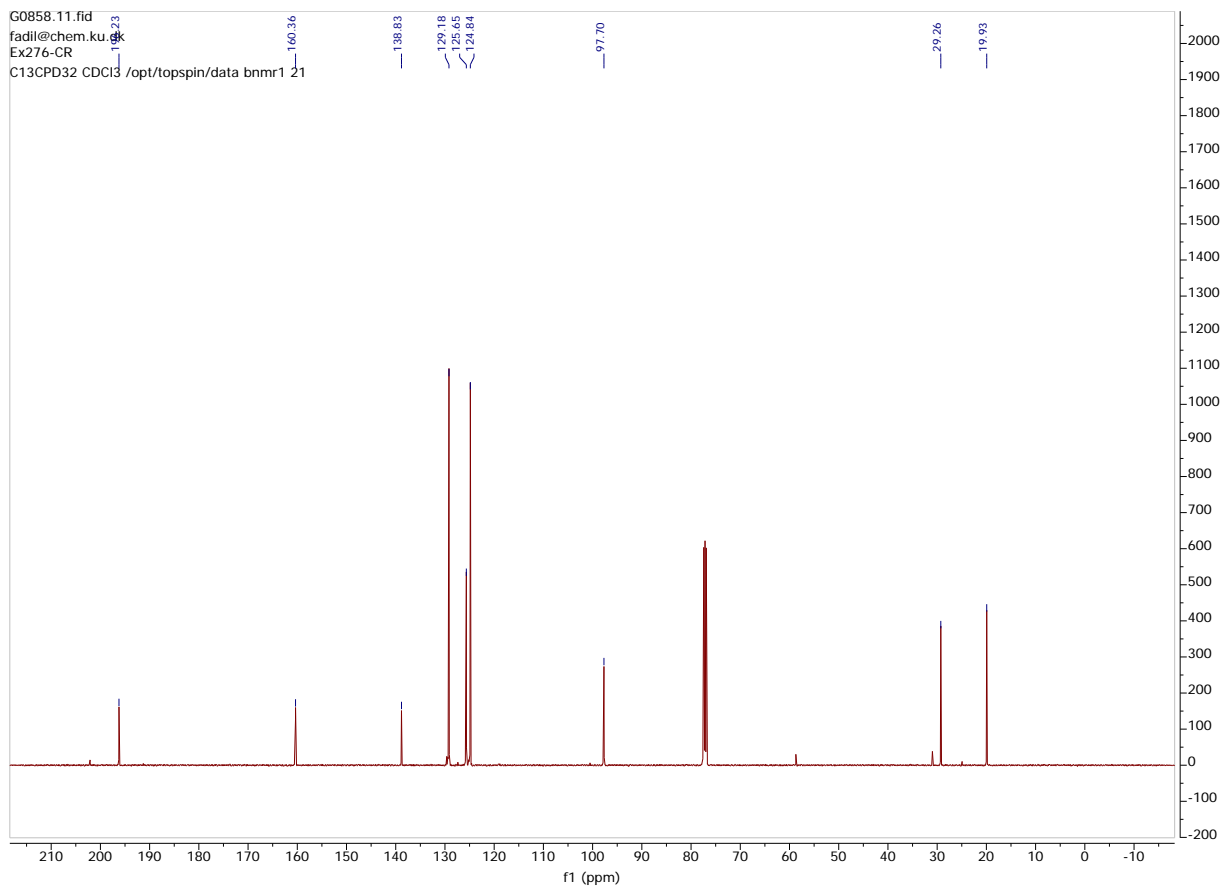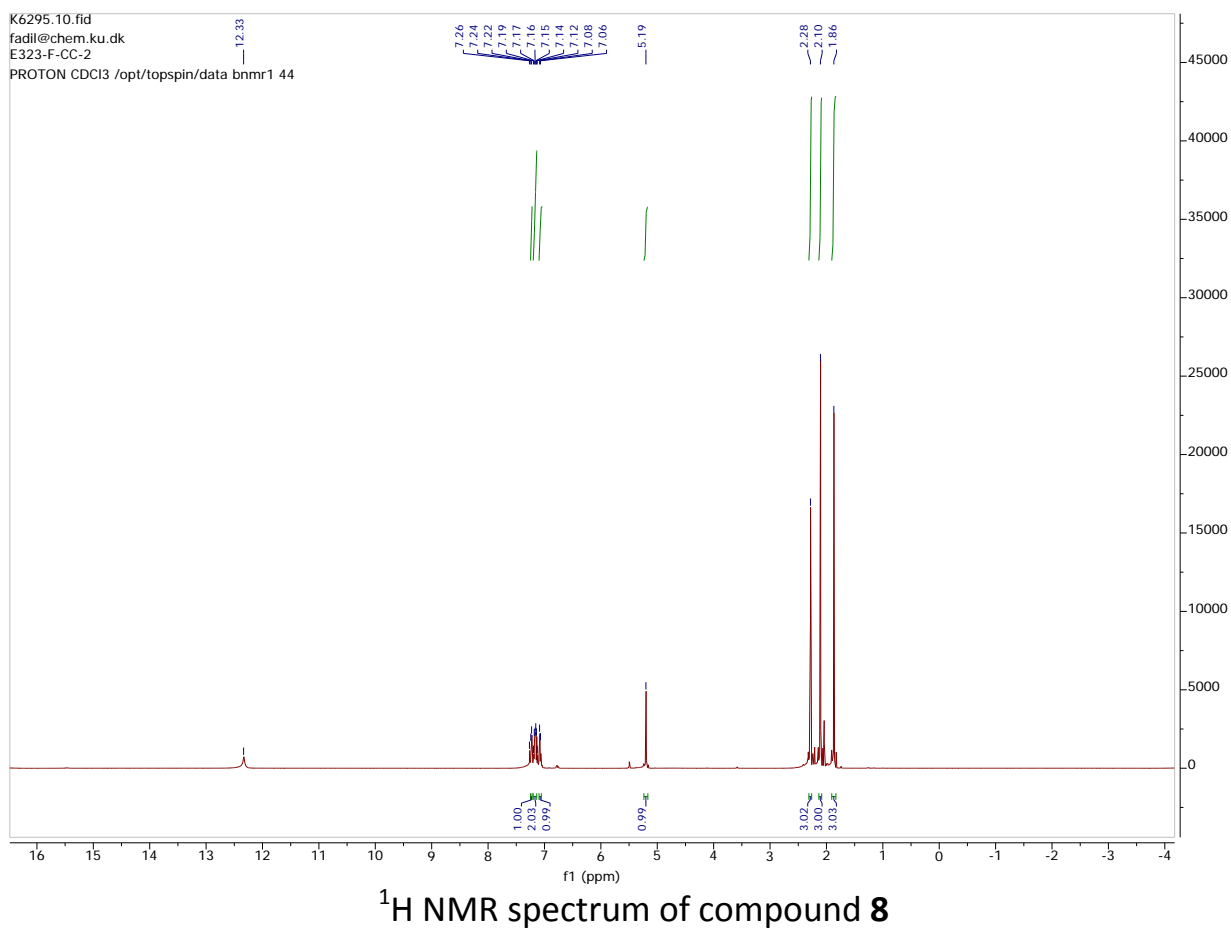

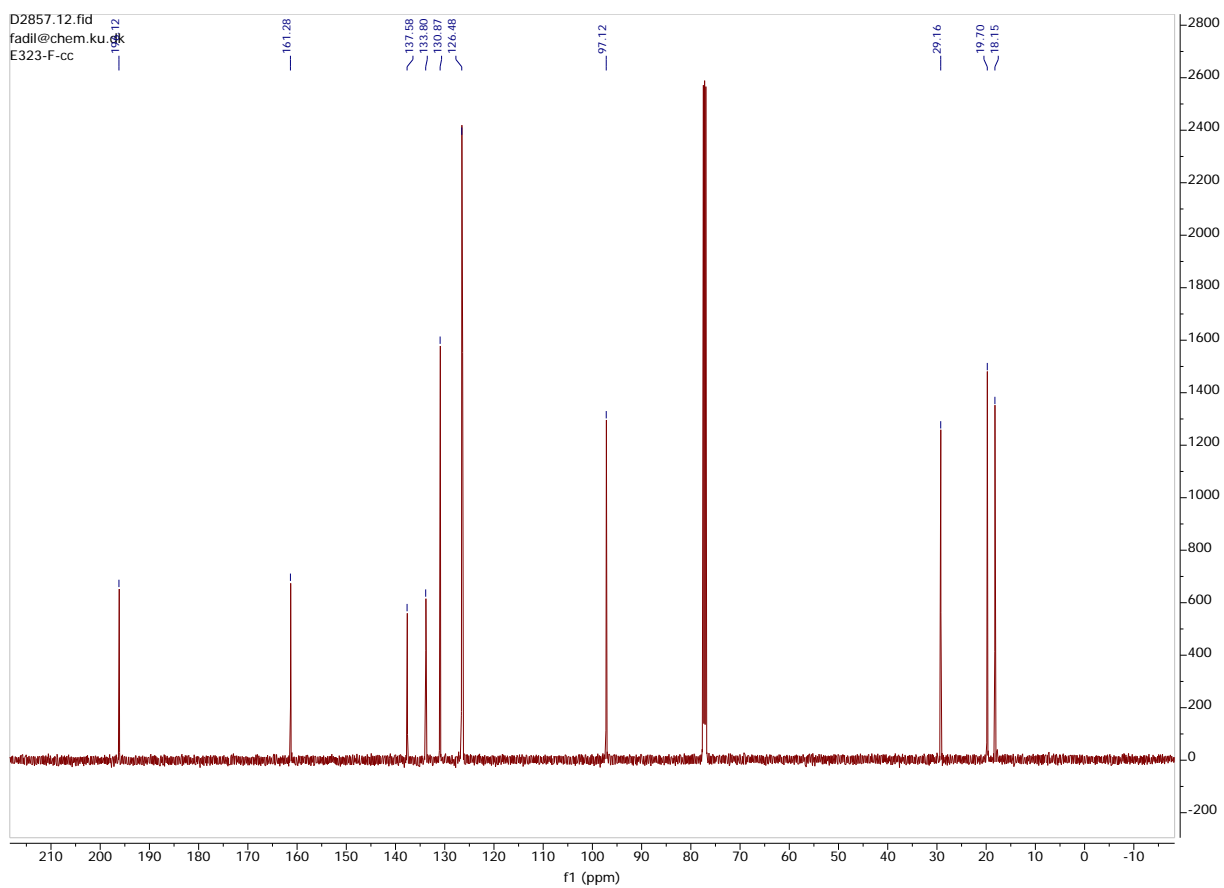

$^{13}\text{C}$  NMR spectrum of compound **8**

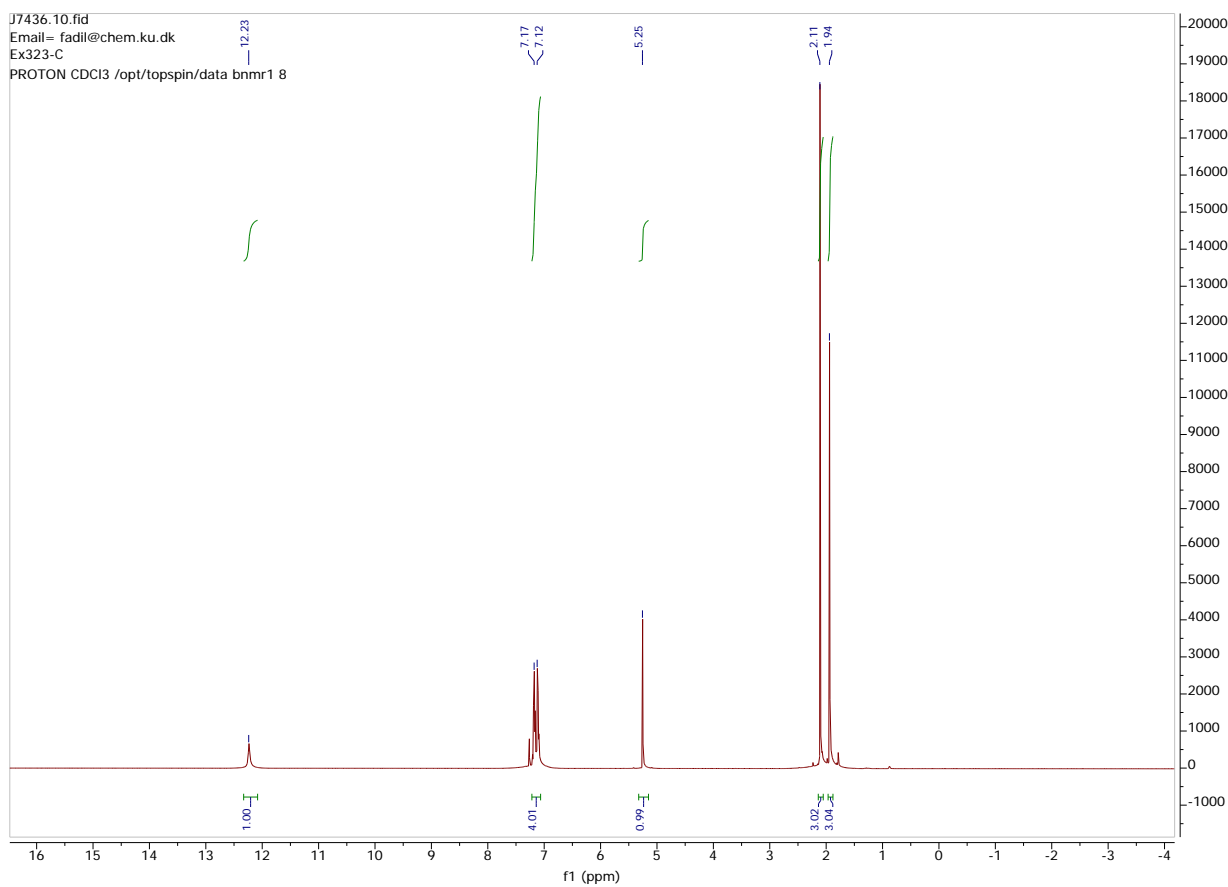

$^1\text{H}$  NMR spectrum of compound **9**

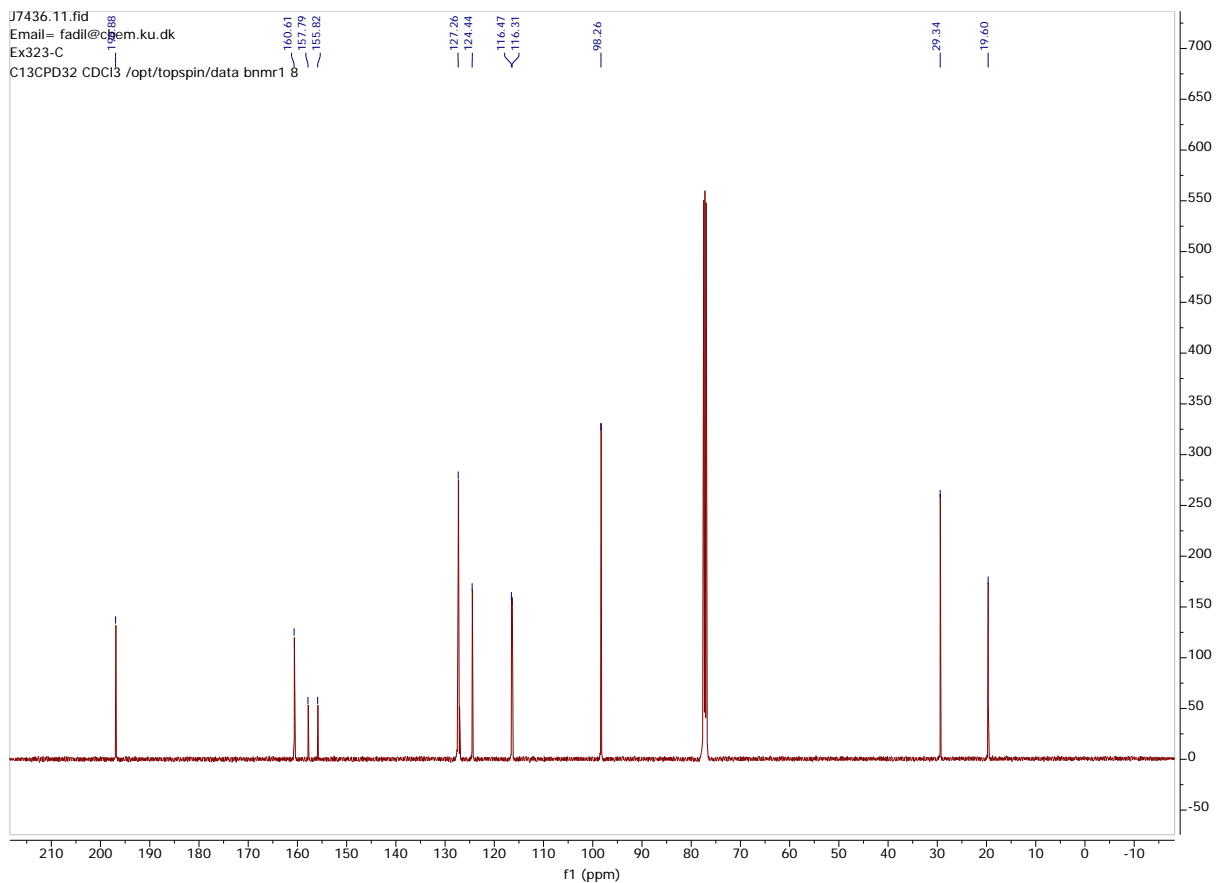

$^{13}\text{C}$  NMR spectrum of compound 9

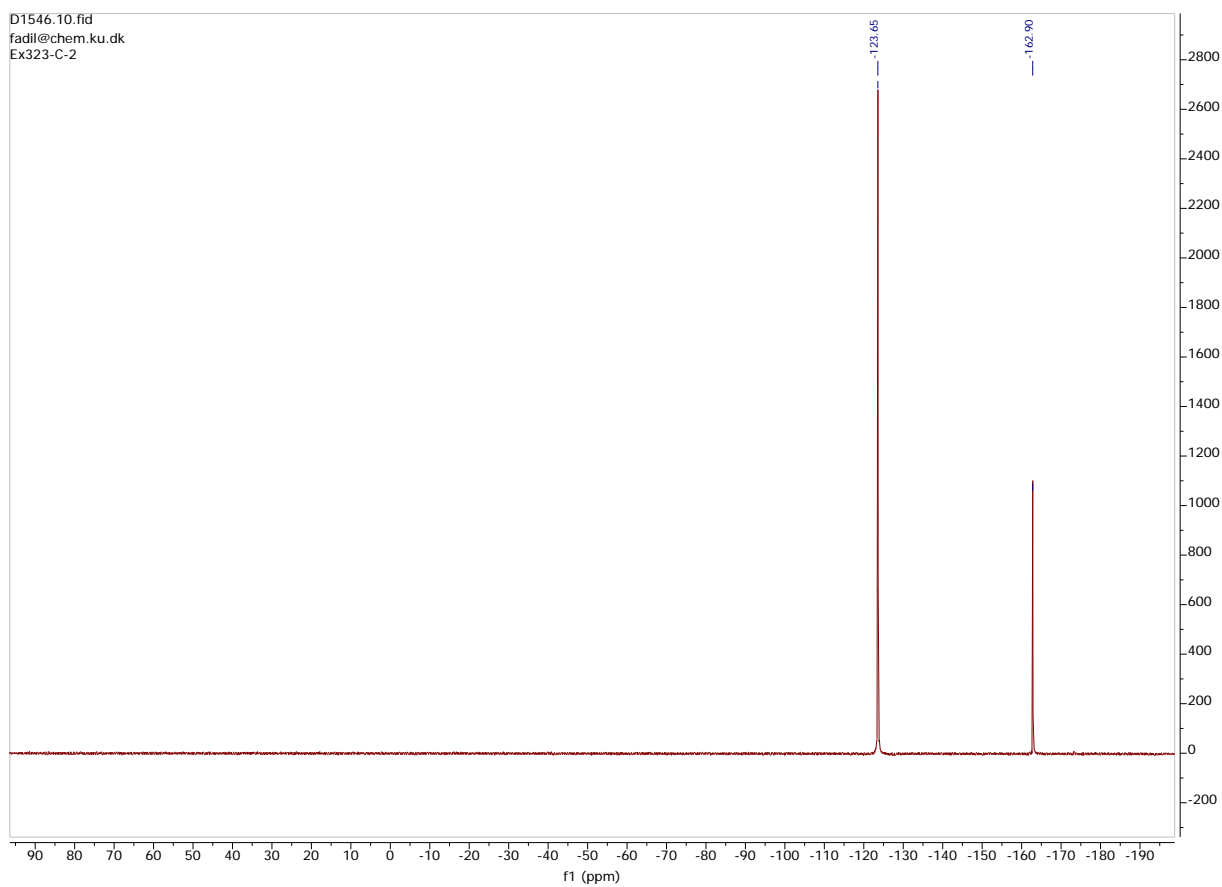

$^{19}\text{F}$  NMR spectrum of compound 9

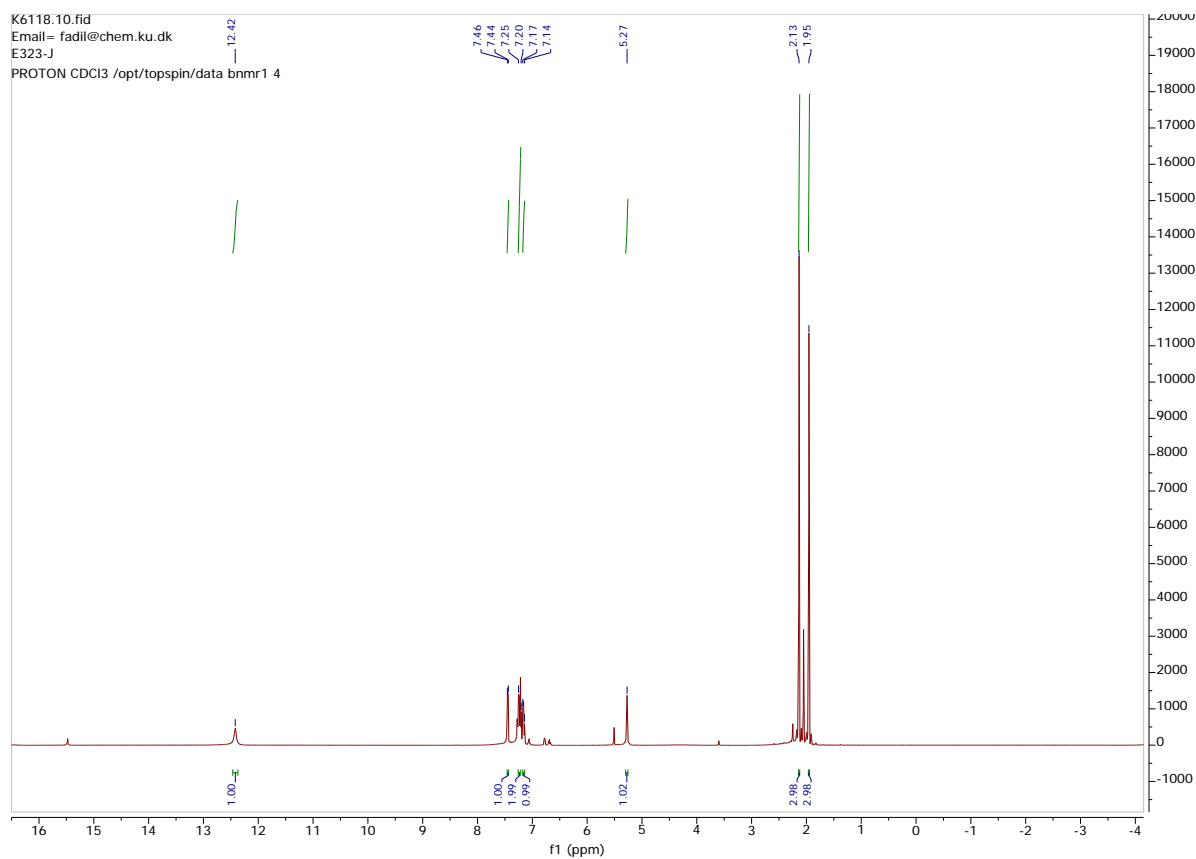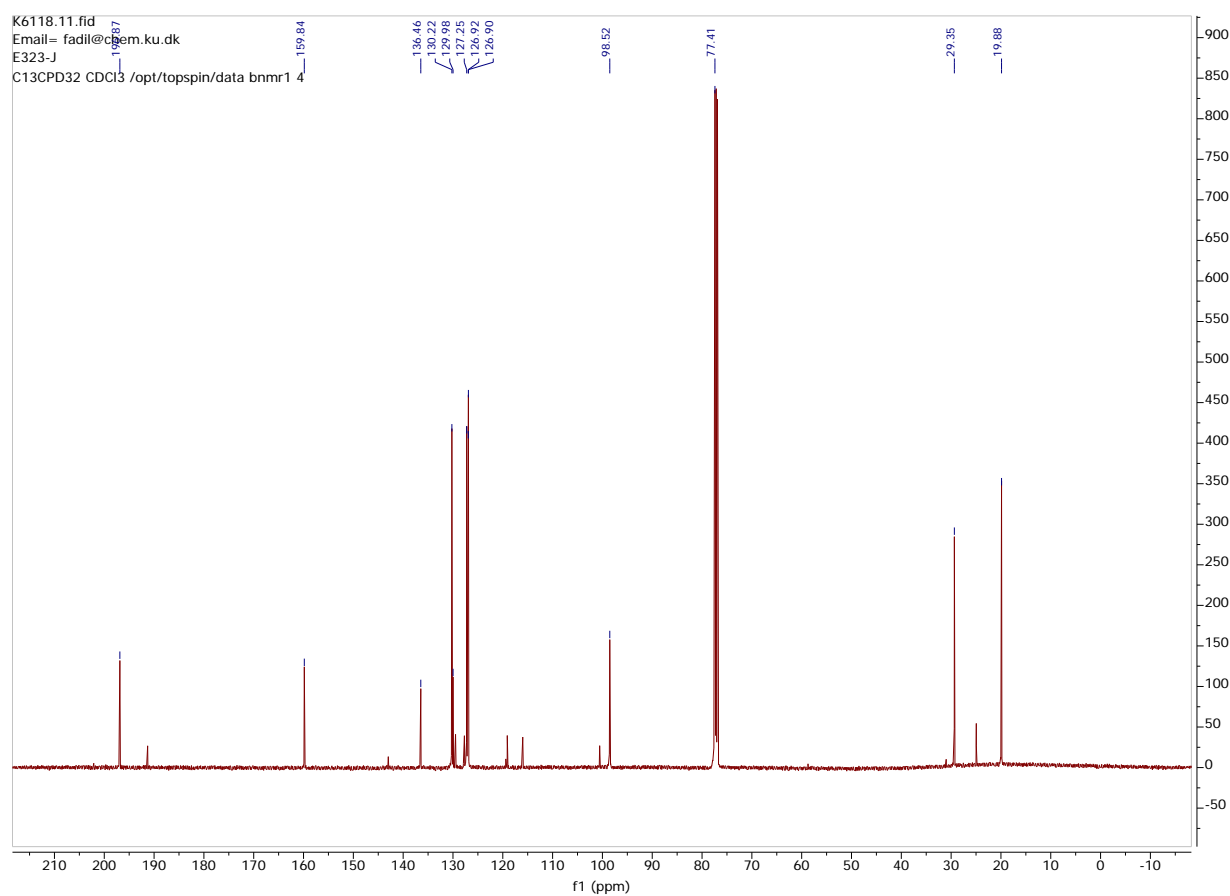

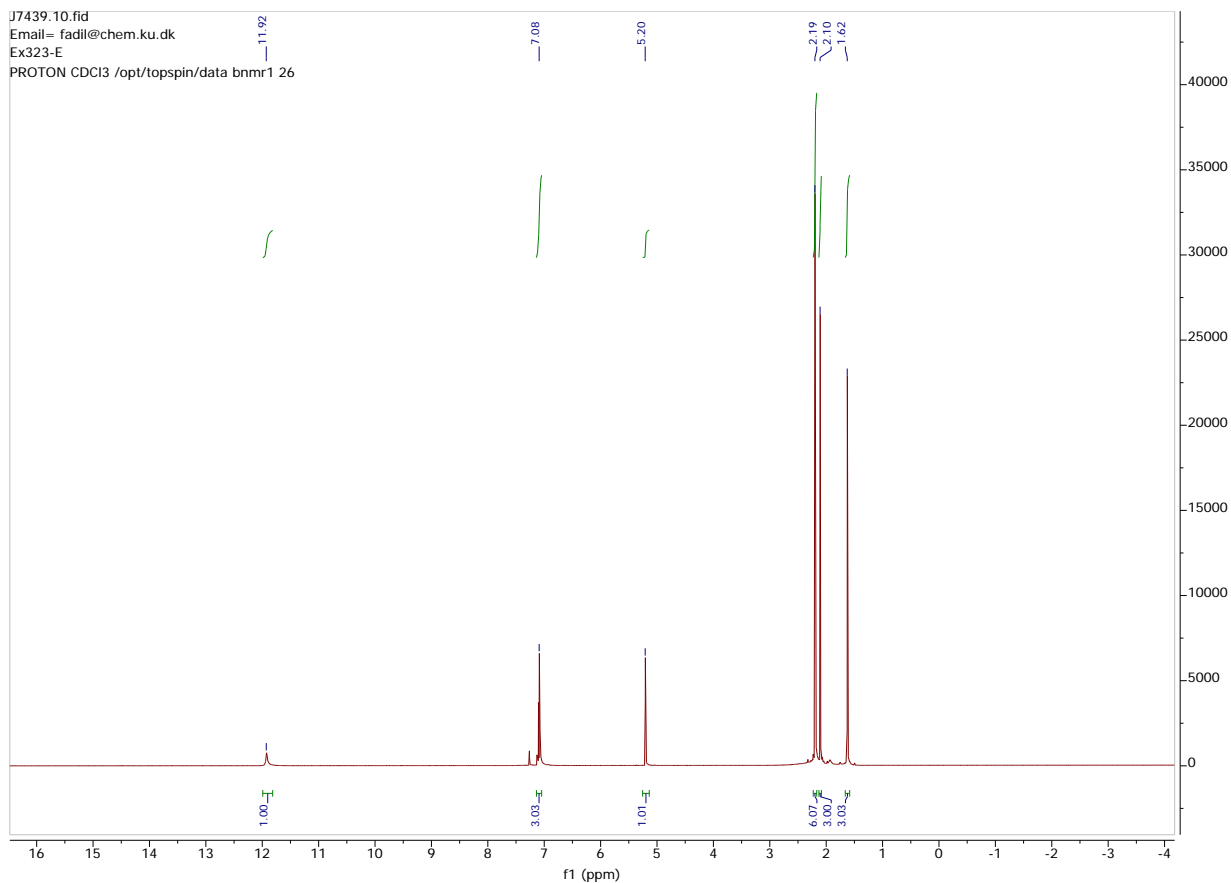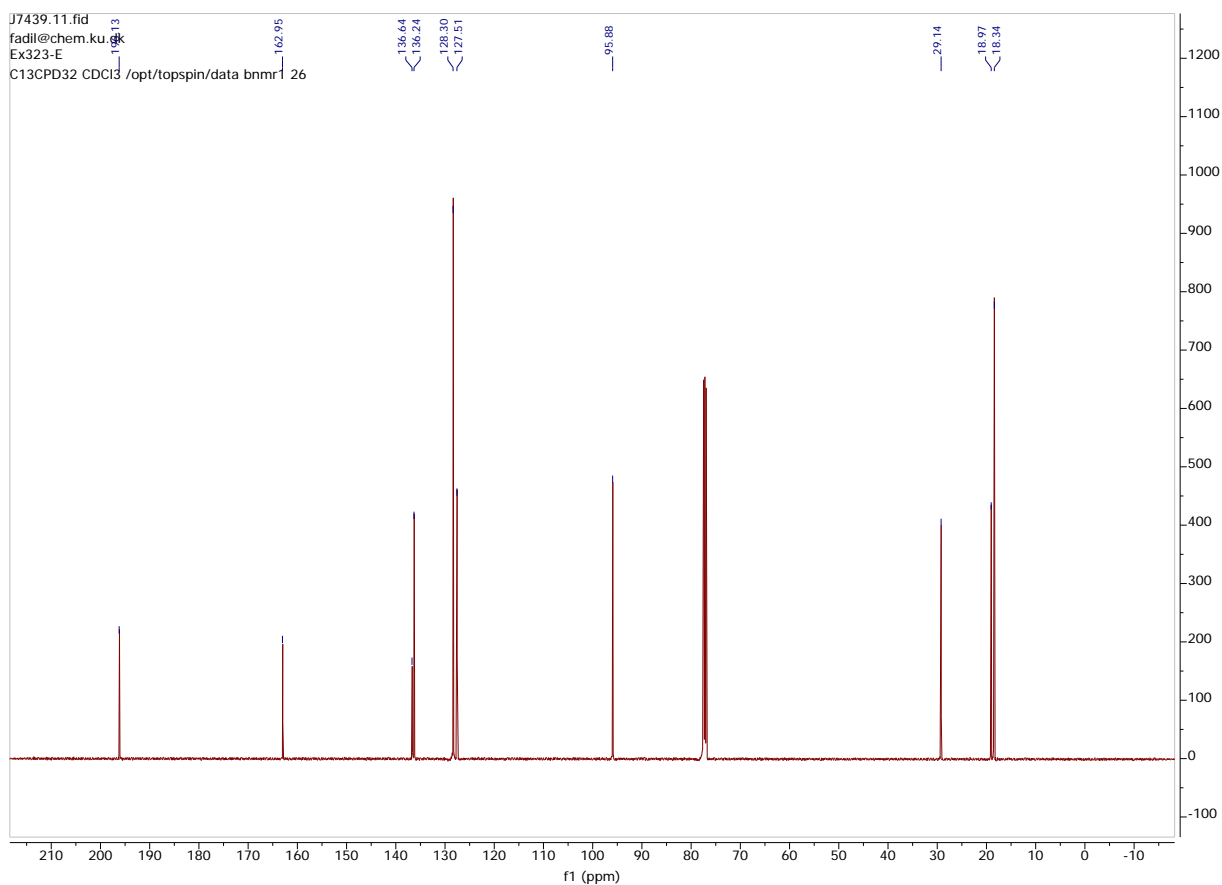

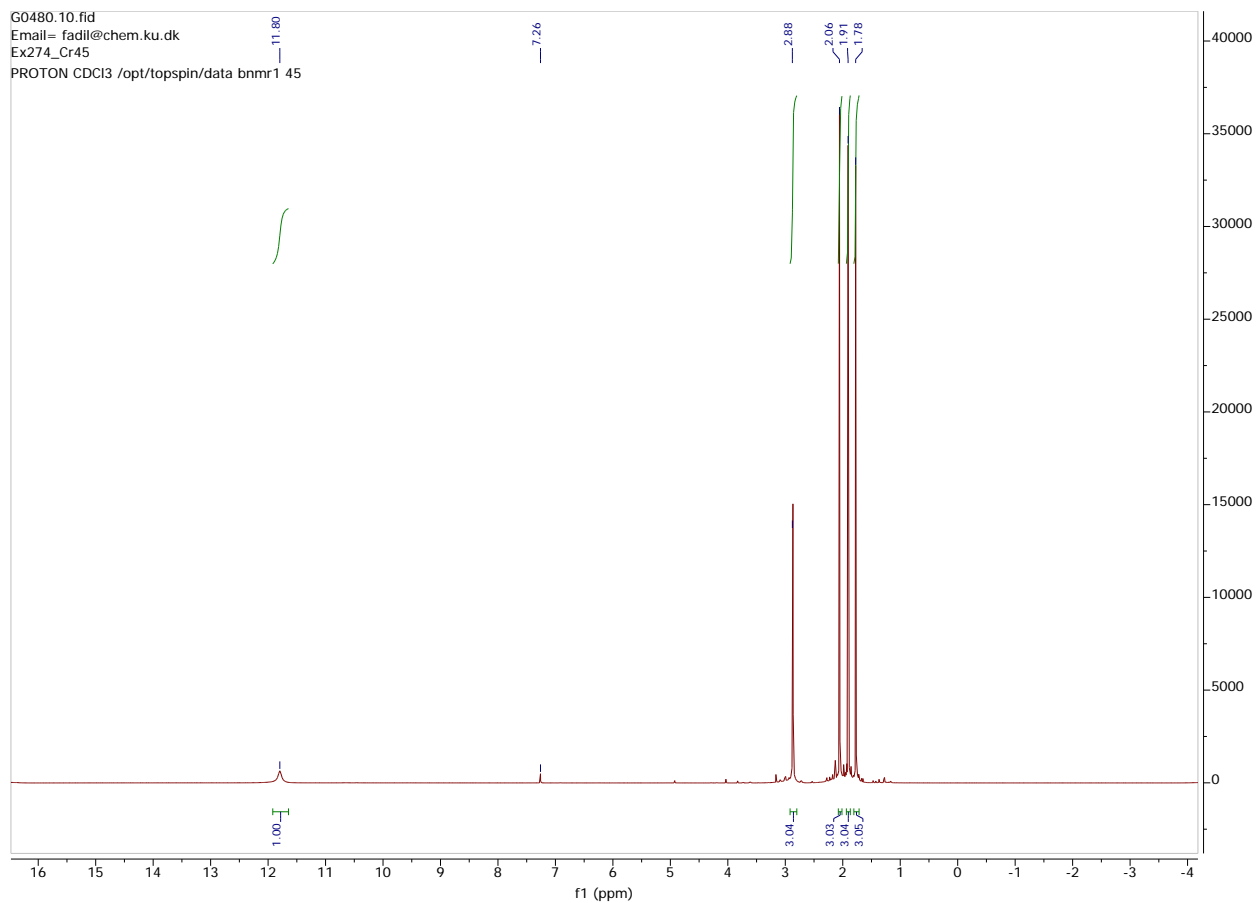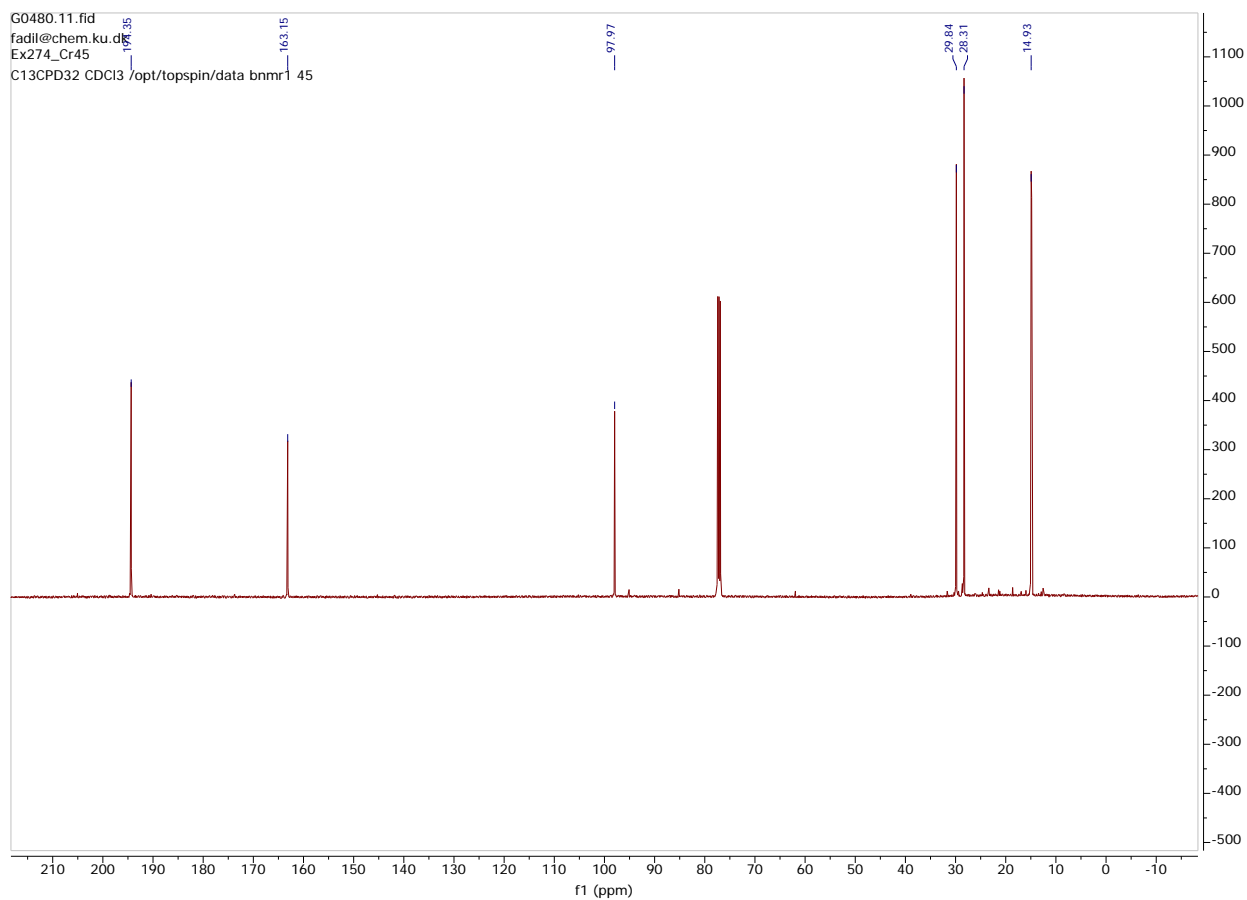

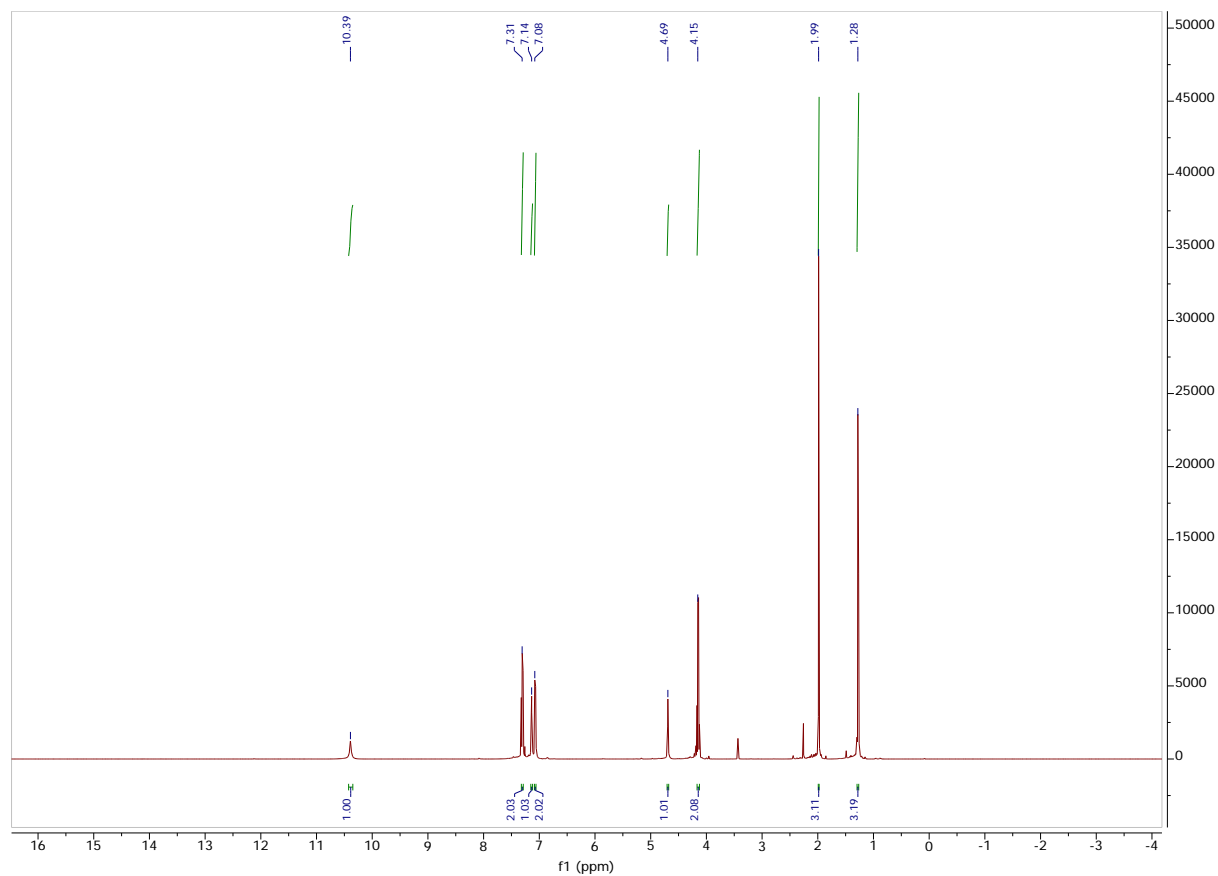

<sup>1</sup>H NMR spectrum of compound **16**

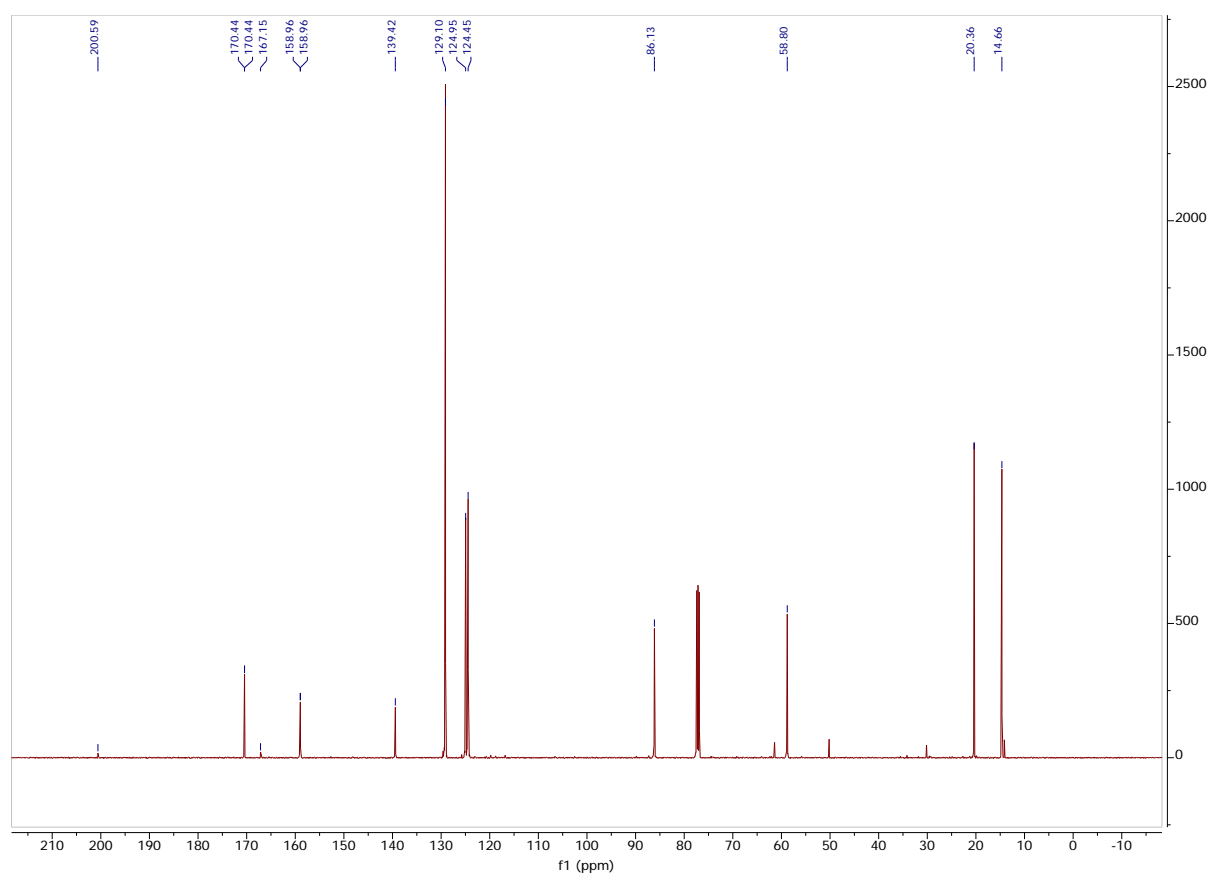

<sup>13</sup>C NMR spectrum of compound **16**



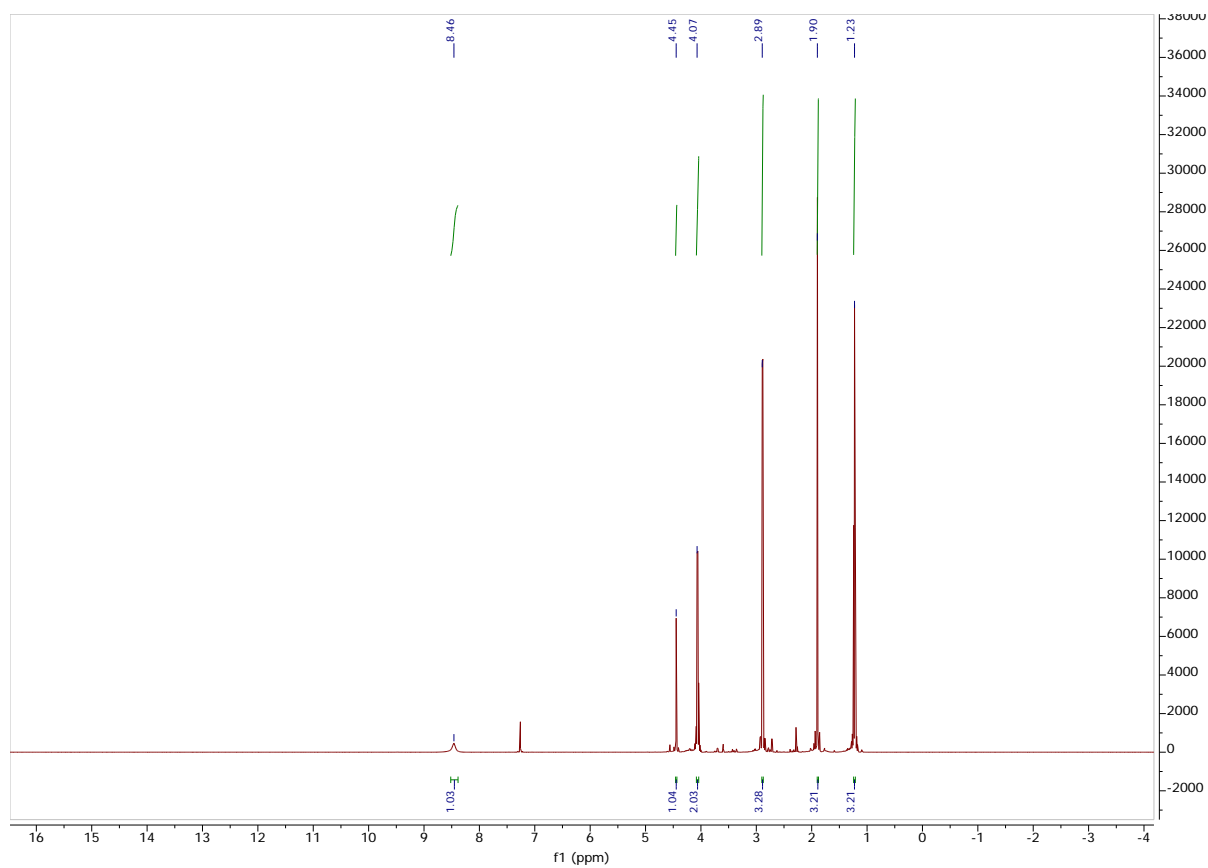

<sup>1</sup>H NMR spectrum of compound **17**

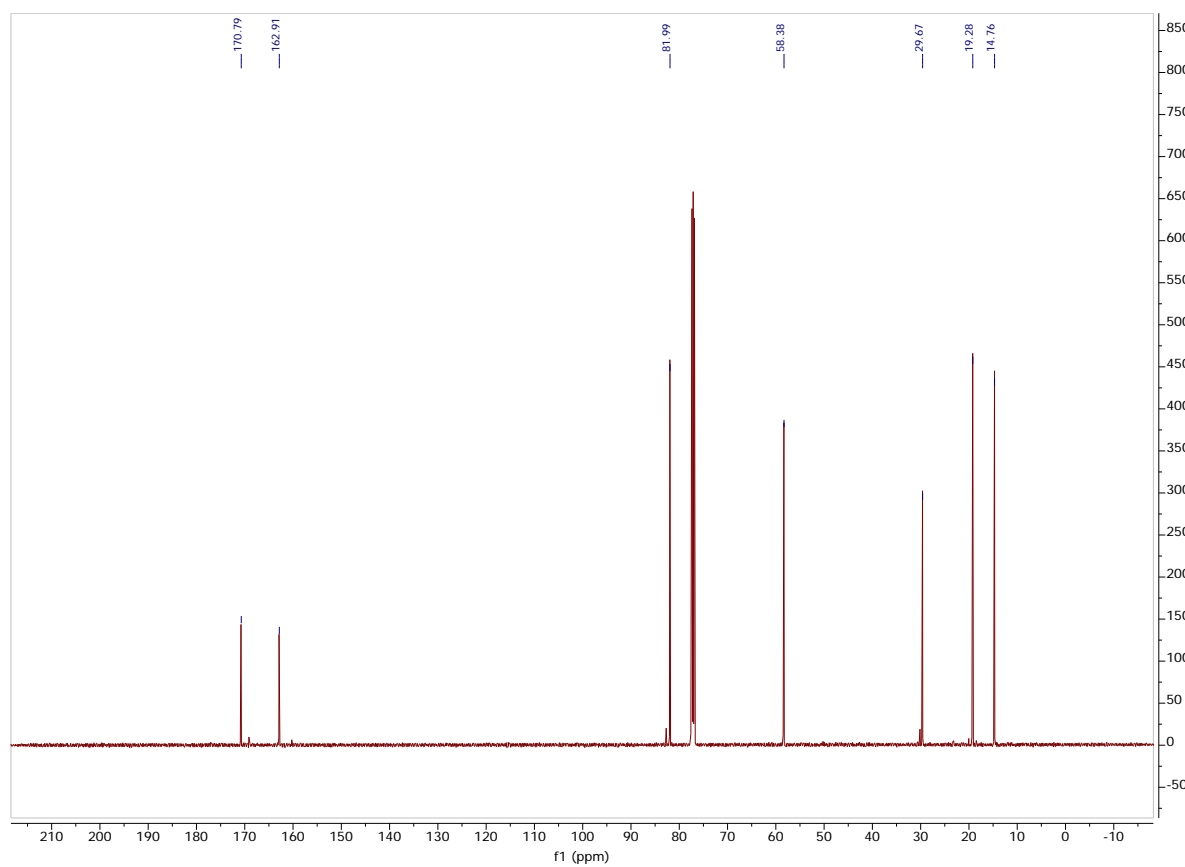

<sup>13</sup>C NMR spectrum of compound **17**

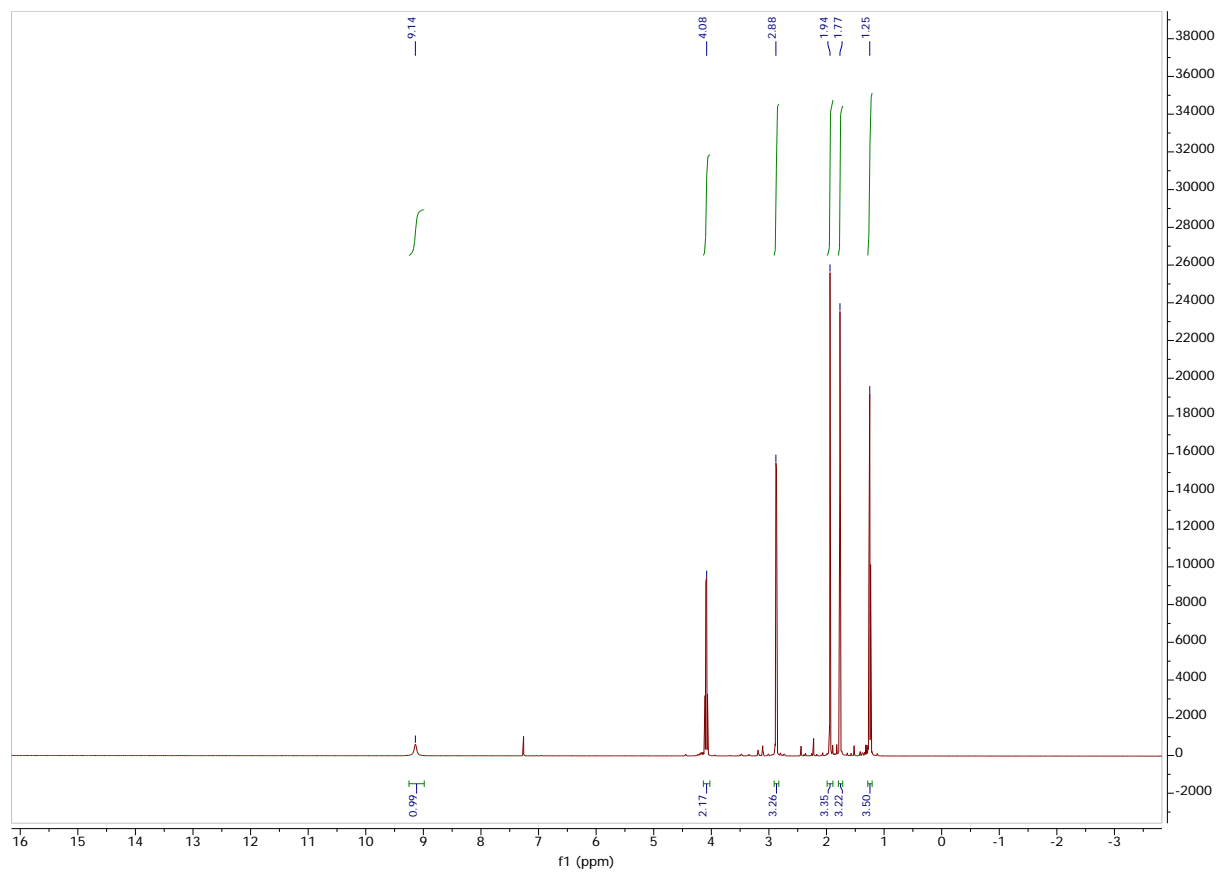

<sup>1</sup>H NMR spectrum of compound **19**

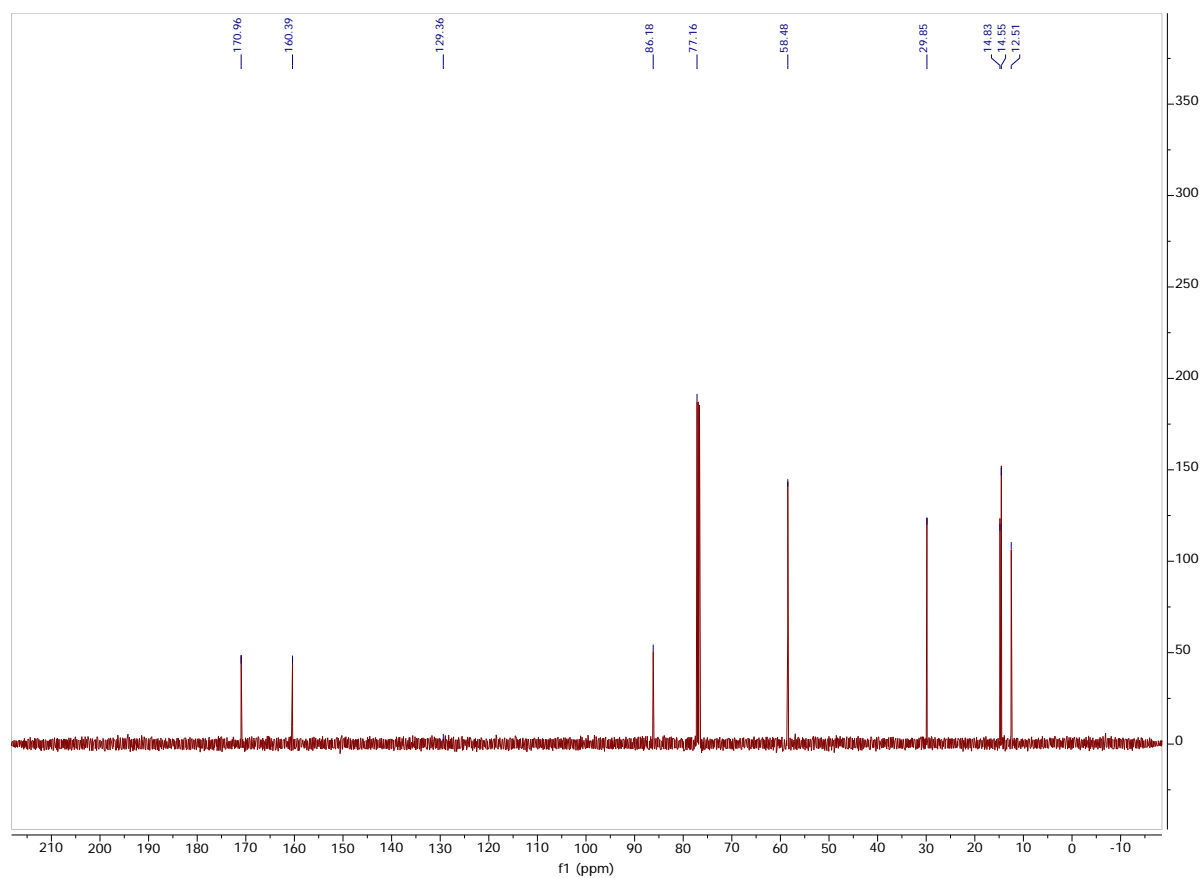

<sup>13</sup>C NMR spectrum of compound **19**

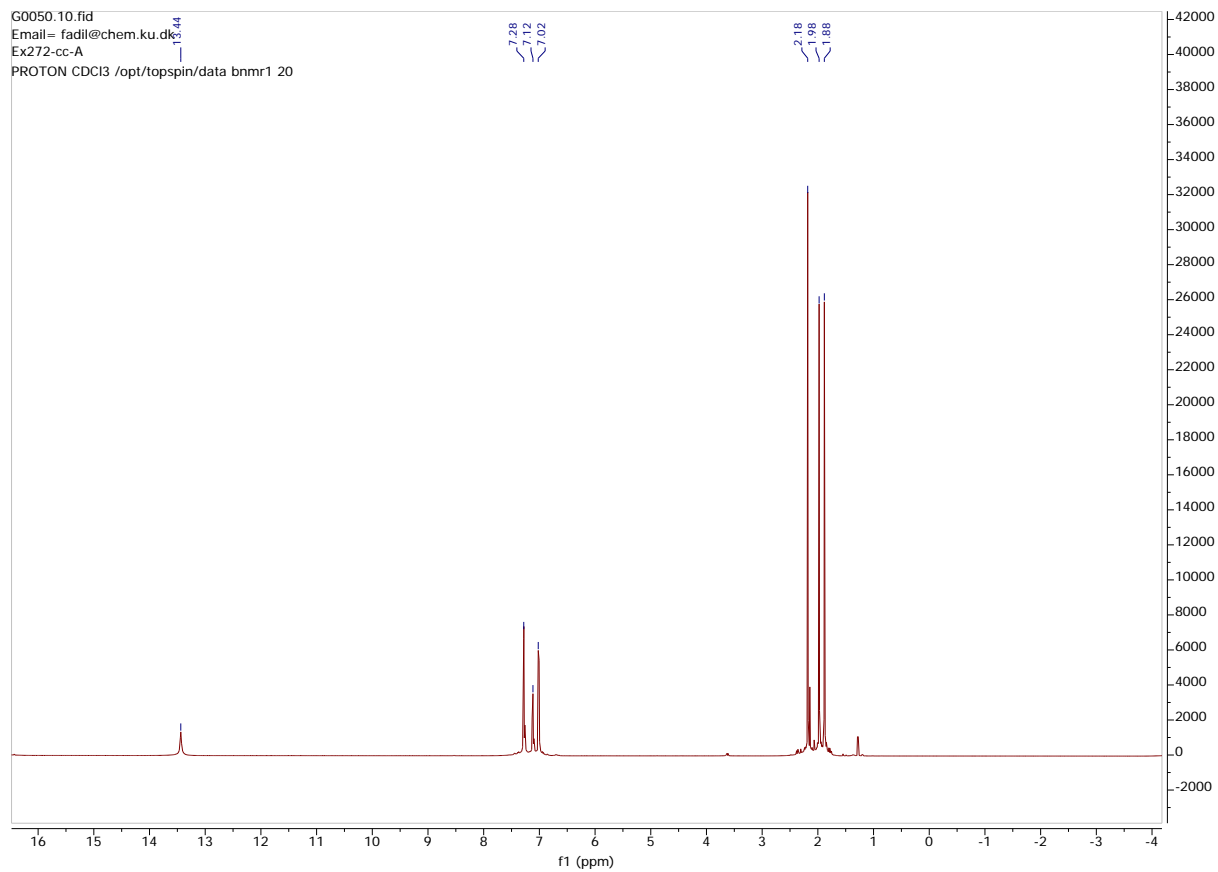

<sup>1</sup>H NMR spectrum of compound **45**

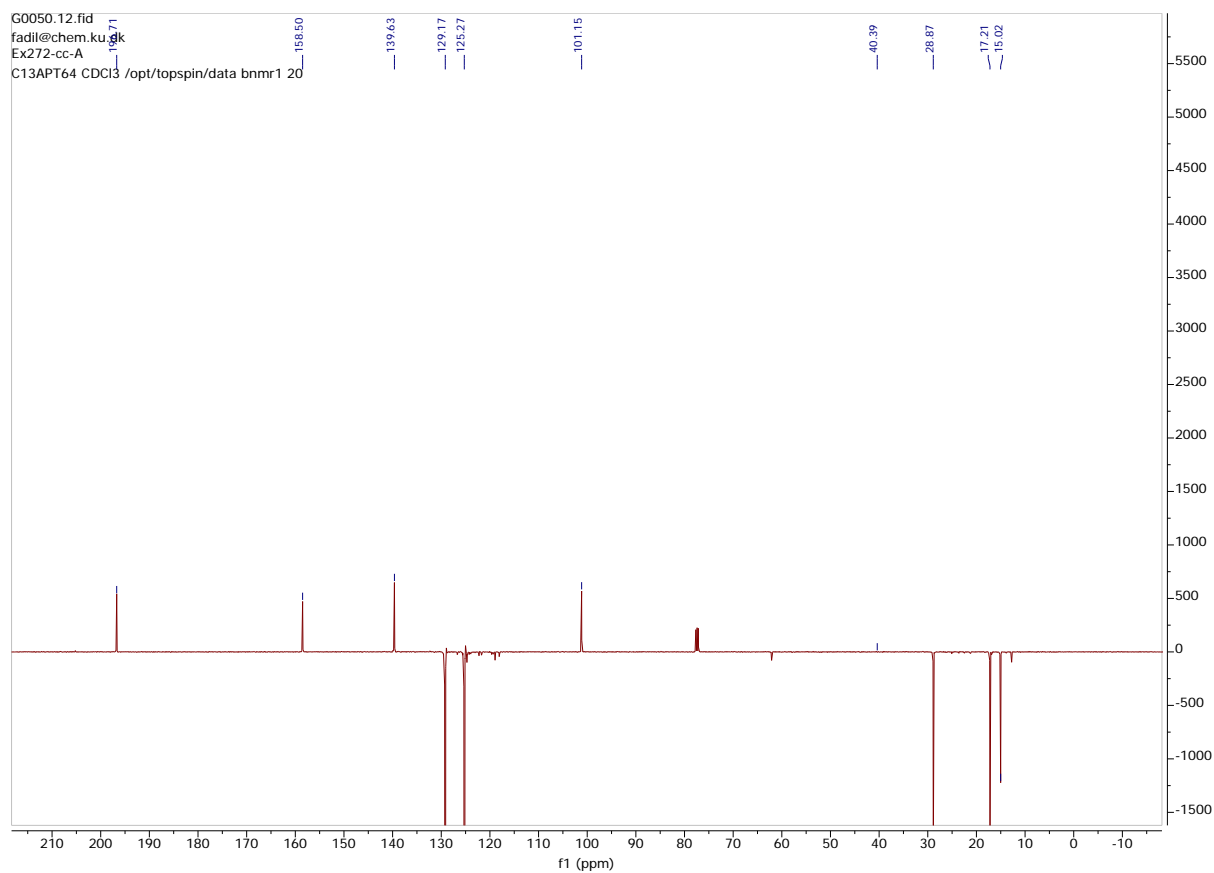

<sup>13</sup>C NMR spectrum of compound **45**
